## An executive center for the intake of liquids

### Authors

Bowen Dempsey<sup>1</sup>, Selvee Sungeelee<sup>1</sup>, Philip Bokinieć<sup>2</sup>, Zoubida Chettouh<sup>1</sup>, Séverine Diem<sup>3</sup>, Sandra Autran<sup>3</sup>, Evan R. Harrell<sup>4</sup>, James F.A. Poulet<sup>2</sup>, Carmen Birchmeier<sup>5</sup>, Harry Carrey<sup>6</sup>, Auguste Genovesio<sup>1</sup>, Simon McMullan<sup>6</sup>, Christo Goridis<sup>1</sup>, Gilles Fortin<sup>†</sup>, Jean-François Brunet<sup>†\*</sup>.

### Affiliations

<sup>1</sup> Institut de Biologie de l'ENS (IBENS), Inserm, CNRS, École normale supérieure, PSL Research University, Paris, France.

<sup>2</sup> Department of Neuroscience, Max Delbrück Center for Molecular Medicine, and Neuroscience Research Center, Charité-Universitätsmedizin, Berlin, Germany.

<sup>3</sup> Université Paris-Saclay, CNRS, Institut des Neurosciences NeuroPSI, Gif-sur-Yvette, France.

<sup>4</sup> Institut Pasteur, INSERM, Institut de l'Audition, Paris, France.

<sup>5</sup> Developmental Biology/Signal Transduction, Max Delbrueck Center for Molecular Medicine, and Cluster of Excellence NeuroCure, Neuroscience Research Center, Charité-Universitätsmedizin, Berlin, Germany.

<sup>6</sup> Faculty of Medicine, Health & Human Sciences, Macquarie University, Australia.

\*Corresponding author: [jfbrunet@biologie.ens.fr](mailto:jfbrunet@biologie.ens.fr)

<sup>†</sup>Equal contribution

### Abstract

It has long been known that orofacial movements for feeding can be triggered, coordinated, and often rhythmically organized at the level of the brainstem, without input from higher centers. We uncover two nuclei that can organize the movements for ingesting fluids in mammals. These neuronal groups, defined by unique transcriptional codes and developmental origins,  $IRt^{Phox2b}$  and  $Peri5^{Atob1}$ , are located, respectively, in the intermediate reticular formation of the medulla and around the motor nucleus of the trigeminal nerve. They are premotor to all jaw-opening and tongue muscles. Stimulation of either, in awake animals, opens the jaw, while  $IRt^{Phox2b}$  alone also protracts the tongue. Moreover, stationary stimulation of  $IRt^{Phox2b}$  entrains a rhythmic alternation of tongue protraction and retraction, synchronized with jaw opening and closing, that mimics lapping. Finally, fiber photometric recordings show that  $IRt^{Phox2b}$  is active during volitional lapping. Our study identifies one of the long hypothesized subcortical nuclei underpinning a stereotyped feeding behavior.

38

39

## 40 MAIN TEXT

41

42

### 43 Introduction

44

45 The hindbrain (medulla and pons) is a sensory and motor center for the head and the  
46 autonomic (or visceral) nervous system. Large areas therein defy conventional cytoarchitectonic  
47 description and are subsumed under the label “reticular formation” (1). Over decades, the  
48 reticular formation has slowly emerged from “localizatory nihilism” (2), and regions defined by  
49 stereotaxy [e.g.(3)], or cell groups defined by their projections [e.g.(4)] have been implicated in a  
50 variety of behaviors. Notably, the reticular formation contains premotor neurons to orofacial or  
51 respiratory muscles, and rhythm generators for chewing, licking, whisking, breathing and sighing  
52 (3)(5)(6)(7)(8)(9). However, the parsing of the reticular formation into genetically defined  
53 neuronal groups, endowed with specific connectivity and roles, has only begun  
54 (10)(11)(12)(13)(14) and lags behind other parts of the brain, such as the cortex or the spinal  
55 cord.

56 Among the most specific markers of neuronal classes are transcription factors, in  
57 particular homeodomain proteins [e.g. (15)(16)]. *Pbox2b* is one such gene, which marks (and  
58 specifies) a limited set of neurons in the peripheral nervous systems and the hindbrain. The  
59 *Pbox2b* expression landscape is strikingly unified by physiology: most *Pbox2b* neurons partake in  
60 the sensorimotor reflexes of the autonomic nervous system, that control bodily homeostasis (17).  
61 An apparent exception are branchial motor neurons, that motorize the face and neck (1),(18) but  
62 their kinship to visceral circuits, aptly highlighted by their alternative name of “special visceral”, is  
63 revealed by their ancestral functions in aquatic vertebrates, exclusively in feeding and breathing  
64 — thus “visceral” indeed. Finally, *Pbox2b* labels neurons in the reticular formation, with  
65 unknown functions so far, that we set out to explore in this study.

66

67

### 68 Results

69

#### 70 The reticular formation harbors *Pbox2b*<sup>+</sup> orofacial premotor neurons

71

72 We visualized the total projections of *Pbox2b* interneurons that are located in the reticular  
73 formation. To exclude the potentially confounding widespread projections of the noradrenergic  
74 locus coeruleus, which also expresses *Pbox2b* (19), we exploited the glutamatergic nature of most  
75 reticular *Pbox2b*<sup>+</sup> interneurons — thus their expression of the glutamate vesicular transporter

76 *vGlut2* (**Fig. S1A**) — and a novel intersectional allele (*Rosa*<sup>FRT<sub>Tomato-loxSypGFP</sub></sup> or *Rosa*<sup>F<sub>TLG</sub></sup>) (**Fig. 1A**)  
77 which expresses one of two fluorophores, exclusively: a cytoplasmic tdTomato (tdT) upon action  
78 of flippase (*FLP<sub>0</sub>*) or, upon additional action of *Cre* recombinase, a fusion of synaptophysin with  
79 GFP (*Syp-GFP*) transported to pre-synaptic sites (20). In the hindbrain of  
80 *Phox2b::Flp<sub>0</sub>;vGlut2::Cre;Rosa*<sup>F<sub>TLG</sub></sup> pups at P4, tdT was expressed, as expected, in the singly  
81 recombined soma of the cholinergic *Phox2b*<sup>+</sup> branchiomotor (and visceromotor) neurons, but  
82 lost from the doubly recombined *vGlut2*<sup>+</sup> *Phox2b*<sup>+</sup> interneurons (**Fig. S1B**), whose *Syp-GFP*<sup>+</sup>  
83 boutons covered discrete structures of the hindbrain (**Fig. S1B, Fig. 1B**). Among the targeted  
84 structures, motor nuclei featured prominently: *i*) most branchiomotor (*Phox2b*<sup>+</sup>) nuclei — the  
85 trigeminal motor nucleus (Mo5) and its accessory nucleus (Acc5), the facial nucleus (Mo7) (albeit  
86 only its intermediate lobe) and its accessory nucleus (Acc7), the nucleus ambiguus (MoA); *ii*) two  
87 somatic (*Phox2b*<sup>-</sup>) motor nuclei: the hypoglossal nucleus (Mo12), and a nucleus in the medial  
88 ventral horn, at the spinal-medullary junction, which innervates the infrahyoid muscles (21) (and  
89 **Fig. S1C**), and that we call MoC (to denote its projection through the upper Cervical nerves)  
90 (21). Other cranial motor nuclei were free of input from *Phox2b*<sup>+</sup>/*vGlut2*<sup>+</sup> interneurons: those for  
91 extrinsic muscles of the eye (oculomotor (Mo3) and trochlear (Mo4)), and for the spinal  
92 accessory nucleus (Mo11), which innervates the sternocleidomastoid and trapezius muscles (**Fig.**  
93 **S1D**). The abducens nucleus (Mo6) however, did receive boutons (**Fig. S1D**). Thus, somewhere  
94 in the reticular formation are *Phox2b*<sup>+</sup> orofacial premotor neurons, which we then sought to  
95 locate.

96 To locate *Phox2b*<sup>+</sup> orofacial premotor neurons, we used retrograde trans-synaptic  
97 viral tracing from oromotor muscles. We injected a G-defective rabies virus variant encoding *m-*  
98 *Cherry* (22) together with a helper virus (*HSV-G*) in the posterior belly of the digastric muscle  
99 (**Fig. 1C**) (a jaw-abductor), which is innervated by Acc7 (23)(24). Acc7 predictably contained the  
100 only seed neurons of the central nervous system (**Fig. 1C**), while *Phox2b*<sup>+</sup> premotor neurons  
101 were found at two sites: *i*) the intermediate reticular formation (IRt) (**Fig. 1D**), and *ii*) “regio h”,  
102 arranged in “shell form” around Mo5 (25), more commonly called the peritrigeminal region  
103 (Peri5) (26) (**Fig. 1E**). We found the same pattern of *Phox2b*<sup>+</sup> premotor neurons for the  
104 genioid muscle (a tongue protractor) (**Fig. S2A**), innervated by the accessory compartment of  
105 Mo12 (Acc12)(21); and we found a subset of this pattern for the genioglossus (a tongue  
106 protractor and/or jaw abductor) (**Fig. S2B**) and for the intrinsic muscles of the tongue (**Fig.**  
107 **S2C**) (both innervated by Mo12), whereby *Phox2b*<sup>+</sup> premotor neurons were restricted to the IRt.  
108 On the other hand, the masseter (the main jaw closing muscle) and the thyro-arytenoid (that  
109 motorizes the vocal cords) had totally distinct premotor landscapes (**Fig. S2D,E**) (27)(28).

110 We next sought to characterize genetically and developmentally the  $Phox2b^+$  orofacial  
111 premotor neurons located in Peri5 and IRt.

112

### 113 **Transcriptional signature and developmental origin of Peri5<sup>Atoh1</sup> and IRt<sup>Phox2b</sup>**

114

115 The  $Phox2b^+$  premotor nucleus that occupies Peri5, we shall call Peri5<sup>Phox2b</sup> (**Fig. 2A,B**).  
116 Because it surrounds, shell-like, a nucleus with a history of  $Phox2b$  expression —Mo5+Acc5 — it  
117 cannot be selectively accessed with  $Phox2b$ -based tools, even refined by stereotaxy. We thus  
118 restricted our study to a distinct subnucleus of Peri5<sup>Phox2b</sup>, which unlike the rest of the nucleus co-  
119 expresses  $Phox2b$  with another transcription factor,  $Atoh1$  (29) and that we shall call Peri5<sup>Atoh1</sup>  
120 (**Fig. 2B-D**). Peri5<sup>Atoh1</sup> is made of 2052±184 cells (n=4) at late gestation (E18.5), is premotor to  
121 the posterior digastric (**Fig. S2F**), and can be selectively targeted in an intersectional  
122  $Phox2b::flpo;Atoh1::Cre$  background (**Fig. 2E**). Peri5<sup>Atoh1</sup> cells express  $Lbx1$  (**Fig. 2F**), thus originate  
123 from the dB progenitor domain (30). More precisely they belong to its dB2 derivatives, at the  
124 leading edge of whose migration stream they become detectable at E11.5, near the incipient Mo5  
125 (**Fig. 2G**).

126 The  $Phox2b^+$  premotor nucleus that occupies IRt, we shall call IRt<sup>Phox2b</sup> (**Fig. 2A**). It shares  
127 with the nearby nTS the  $Phox2b/Tlx3/Lmx1b$  signature and an origin in  $Olig3^+$  progenitors (i.e.  
128 the pA3 progenitor domain (31)) (**Fig. 2A,H**). It is distinguished, however, by expression of the  
129 transcriptional cofactor  $Cited1$  (**Fig. 2I**). IRt<sup>Phox2b</sup> segregates topographically from nTS at E13.5  
130 (**Fig. 2I**) from which it can thus be told apart by stereotaxy. The border between the two nuclei  
131 is marked by the intramedullary root of Mo10 (**Fig. 2J**). Unlike nTS, IRt<sup>Phox2b</sup> does not receive any  
132 input from the tractus solitarius (**Fig. 2K**). Thus, IRt<sup>Phox2b</sup> and nTS are two structures related by  
133 lineage, which acquire distinct molecular, topological and hodological identities.

134

### 135 **Peri5<sup>Atoh1</sup> and IRt<sup>Phox2b</sup> target jaw opening and tongue muscles**

136

137 We confirmed the premotor status of Peri5<sup>Atoh1</sup> or IRt<sup>Phox2b</sup> in adult animals by anterograde  
138 tracing with viral and transgenic tools (**Fig. 3**). For Peri5<sup>Atoh1</sup>, we used the  $Rosa^{FTLG}$  allele  
139 recombined by  $Phox2b::Flpo$  (32) and  $Atoh1::Cre$  (13) (**Fig. 3A**). The  $GFP^+$  boutons covered Acc5,  
140 intermediate Mo7, Acc7, Mo10, Mo12 and MoC (**Fig. 3A-F**). In Mo12, the rostro-ventral  
141 compartment was excluded (**Fig. 3D,E**). Because the retrotrapezoid nucleus (RTN) is also  
142  $Atoh1^+/Phox2b^+(13)$ , thus could confound this pattern, we confirmed the projections of Peri5<sup>Atoh1</sup>  
143 by anterograde tracing with a  $Cre$ -dependent adeno-associated virus (AAV) expressing  $mGFP$  and

144 *Syp-mRuby* (33) injected in Mo5 of a mouse harboring both, *Pbox2b-Flpo* and an *Atob1-Cre* that is  
145 dependent on *Flpo* (*Atob1::FRTCre*)(13) (**Fig. S3A,B**). Using the same vector stereotaxically  
146 injected in IRT<sup>*Pbox2b*</sup> of a *Pbox2b::Cre* mouse, we found the projections from IRT<sup>*Pbox2b*</sup> in the same  
147 motor nuclei as those from Peri5<sup>*Atob1*</sup> (**Fig. 3G-L**)— with the notable difference that in Mo12, the  
148 ventral compartment was targeted, rather than the dorsal one (compare **Fig. 3J,K** with **Fig.**  
149 **3D,E**).

150 To map putative collaterals of *Pbox2b*<sup>+</sup> premotor neurons, we performed a retrograde  
151 transsynaptic tracing experiment from the posterior digastric in a genetic background that, in  
152 addition, labels the boutons of all *Pbox2b*<sup>+</sup> neurons with GFP (*Pbox2b::Cre;Rosa::Syp-GFP*) (**Fig.**  
153 **3M**). Double-labeled terminals (*m-Cherry*<sup>+</sup>; *Syp-GFP*<sup>+</sup>) — thus, sent by neurons that are both,  
154 *Pbox2b*<sup>+</sup> and premotor to the posterior digastric — were found, in addition to Acc7 (the motor  
155 nucleus of the injected muscle), in Acc5, intermediate Mo7, Mo12 and MoC (**Fig. 3N-Q**). Thus,  
156 *Pbox2b*<sup>+</sup> orofacial premotor neurons to Acc7 are collateralized in a way that hardwires Acc5,  
157 intermediate Mo7, Acc7, Mo12 and MoC to activate their target muscles together.

158 The combined action of head motor nuclei innervated by Peri5<sup>*Atob1*</sup> and IRT<sup>*Pbox2b*</sup> should  
159 mobilize the jaw, lower lip and tongue: Acc5 and Acc7 innervate the four suprahyoid  
160 muscles(34)(35)(36), which depress the jaw via the hyoid apparatus. Intermediate Mo7 innervates  
161 the *platysma* (36), probably a jaw depressor (37), and a *mentalis* (36), which, together with the  
162 *platysma*, pulls down the lower lip. Ventral Mo12, targeted by IRT<sup>*Pbox2b*</sup>, innervates tongue  
163 protractors (38), while dorsal Mo12, targeted by Peri5<sup>*Atob1*</sup>, innervates tongue retractors (39).  
164 Finally, MoC innervates the infrahyoid muscles, classically viewed as stabilizers of the hyoid  
165 during jaw lowering, but which probably collaborate with the suprahyoids in a more complex  
166 fashion (40).

167 In addition to motor nuclei, IRT<sup>*Pbox2b*</sup> projected massively to the peri5 region (**Fig. 3H**) and  
168 Peri5<sup>*Atob1*</sup> projected massively to IRT (**Fig. S3C**), including IRT<sup>*Pbox2b*</sup> (**Fig. S3D**, inset). Thus,  
169 Peri5<sup>*Atob1*</sup> and IRT<sup>*Pbox2b*</sup> appear reciprocally connected and in a position to, collectively, lower the  
170 jaw, while retracting or protracting the tongue, respectively.

171

### 172 **Peri5<sup>*Atob1*</sup> and IRT<sup>*Pbox2b*</sup> can trigger tongue and jaw movements**

173

174 We optogenetically stimulated IRT<sup>*Pbox2b*</sup> or Peri5<sup>*Atob1*</sup> in head-fixed awake animals. To do so,  
175 we injected a *Cre*-dependent AAV that directs expression of the *CoChR* opsin to the cell soma,  
176 either in IRT<sup>*Pbox2b*</sup> of *Pbox2b::Cre* mice (**Fig. 4A**), or in Peri5<sup>*Atob1*</sup> of *Pbox2b::Flpo;Atob1<sup>FRTCre</sup>* mice  
177 (**Fig. 4B**). Single light pulses (50ms) on IRT<sup>*Pbox2b*</sup> evoked a wide opening of the mouth

178 accompanied by tongue protraction, which terminated upon cessation of the pulse (**Fig. 4A**),  
179 while the same stimulus applied to  $\text{Peri5}^{\text{Atob1}}$  triggered only mouth opening, of smaller amplitude  
180 (**Fig. 4B**). Thus, both nuclei can open the mouth, in agreement with their projections on the  
181 motoneurons for the suprahyoid and infrahyoid muscles (**Fig. 1B, Fig. S2A, Fig. 3**), while  
182  $\text{IRt}^{\text{Phox2b}}$  but not  $\text{Peri5}^{\text{Atob1}}$  can protract the tongue, in line with the targeting of hypoglossal  
183 motoneurons for tongue protractors by the former and tongue retractors by the latter (**Fig.**  
184 **3D,E,J,K**). Lengthening the light pulse on  $\text{IRt}^{\text{Phox2b}}$  (to 100ms or 200ms) analogically prolonged  
185 the mouth opening and tongue protraction (**Fig. 4C**). Unexpectedly however, further  
186 lengthening led to termination of the initial movement and its rhythmic repetition at around 7Hz  
187 (**Fig. 4C, Fig. S4A, Movie 1**), a frequency similar to that of naturally occurring licking (**Fig.**  
188 **S4B**) (41). Prolonged illumination of  $\text{Peri5}^{\text{Atob1}}$  only prolonged the initial mouth opening (**Fig.**  
189 **4D, Fig. S4C, Movie 2**). Thus, a contrast between the actions of photo-stimulated  $\text{Peri5}^{\text{Atob1}}$  and  
190  $\text{IRt}^{\text{Phox2b}}$  lies in the ability of the latter to translate stationary excitation into a rhythmic series of  
191 oromotor movements, akin to naturally occurring licking (41). This action requires that  $\text{IRt}^{\text{Phox2b}}$ ,  
192 on the one hand, engages a circuit that allows for delayed activation of antagonistic muscles. One  
193 such circuit might comprise the reciprocal projections of  $\text{Peri5}^{\text{Atob1}}$  and  $\text{IRt}^{\text{Phox2b}}$  (**Fig. 3H, Fig.**  
194 **S3C,D**) for patterning the alternation of tongue protractions and retractions. In addition,  $\text{IRt}^{\text{Phox2b}}$   
195 triggers rhythmicity and thus must be the long-hypothesized licking rhythm generator (42), or an  
196 element thereof — akin to another nearby  $\text{Phox2b}^+$  nucleus, the RTN, which has rhythmic  
197 properties, in that case related to breathing, in the neonate (43)(12).

198

### 199 $\text{IRt}^{\text{Phox2b}}$ is active during volitional licking

200

201 We then tested whether  $\text{IRt}^{\text{Phox2b}}$  is active during spontaneous fluid ingestion. We recorded  
202 the bulk fluorescence (44) of  $\text{IRt}^{\text{Phox2b}}$  in head-fixed  $\text{Phox2b}::\text{Cre}$  mice, injected in  $\text{IRt}^{\text{Phox2b}}$  with a  
203 *Cre*-dependent AAV encoding the calcium indicator *jRCaMP7s* (45) and implanted with an optical  
204 cannula (**Fig. 4E**). During freely initiated bouts of licking from a water-spout, we observed a  
205 systematic increase in fluorescence of  $\text{IRt}^{\text{Phox2b}}$  immediately upon deflection of the jaw that  
206 preceded individual licks or bouts of lapping (**Fig. 4F,G, Movie 3**). Thus,  $\text{IRt}^{\text{Phox2b}}$  neurons,  
207 capable of triggering a licking behavior with physiological frequency, are active during such  
208 spontaneous behavior. Importantly,  $\text{IRt}^{\text{Phox2b}}$  encompasses the location of many neurons identified  
209 as rhythmically active during licking (6). Stationary optogenetic stimulation of this nucleus might  
210 emulate the effect of sustained drive from the licking area of the oromotor cortex  
211 (46)(47)(48)(49).



212

### 213 **Inputs to IRt<sup>Phox2b</sup>**

214

215 Although decerebrated mammals can display “reflexive” licking (50)(51), volitional or  
216 self-initiated licking requires higher brain centers. To explore the substratum for this requirement,  
217 we traced the inputs to IRt<sup>Phox2b</sup> by co-injecting it with a pseudotyped G-defective rabies virus  
218 variant encoding *m-Cherry* and a helper virus that depends on *Cre*, in a *Phox2b::Cre* background  
219 (**Fig. 5A**). The vast majority of inputs (about 90%) were in the brainstem (**Fig. 5B**), which could  
220 explain the largely intact reflexive behavior of decerebrated animals. Among these regional  
221 inputs, many were found in IRt itself, including contralaterally (**Fig. 5C**) — suggesting local  
222 interconnectivity of IRt neurons, possibly related to rhythmogenesis. Other regional inputs came  
223 from the peri5 region (**Fig. 5D**) — likely including Peri5<sup>Atob1</sup> that we had traced anterogradely to  
224 IRt<sup>Phox2b</sup> (**Fig. S3D**)—, the mesencephalic nucleus of the trigeminal nerve (Mes5) (**Fig. 5E**) —  
225 which harbors proprioceptors for the teeth and masseter, potentially allowing for a cross-talk  
226 between jaw position and tongue movement (53), and the superior colliculi (**Fig. 5F**) —whose  
227 inhibition disrupts self-initiates licking (52). Finally, we found an input from the cortex (**Fig. 5G**),  
228 where a subclass of pyramidal tract neurons are known to directly target orofacial promotor  
229 neurons (48).

230

### 231 **Discussion**

232 Our study uncovers two genetically coded neuronal groups in the reticular formation,  
233 involved in orofacial movements. They are premotor to orofacial muscles and collaterized, thus  
234 in a position to coordinate the contraction of a precise set of muscles to the exclusion of others,  
235 a property previously highlighted in studies of orofacial premotor neurons ((9) (and references  
236 therein). As such, they represent an essential hierarchical level in the orchestration of complex  
237 oropharyngeal behaviors. In addition, one of them, IRt<sup>Phox2b</sup>, likely corresponds to the  
238 hypothetical licking CPG (42) which had been putatively located by correlative and lesioning  
239 studies ((6)(5) for reviews), or part thereof. So far, discussions of orofacial premotor neurons and  
240 rhythm generators have remained non-committal as to their mutual relationship (6)(5)(9). The  
241 most parsimonious interpretation of IRt<sup>Phox2b</sup> is that its neurons are bifunctional: premotor  
242 through their collaterized inputs on motor nuclei, and rhythm generators. We cannot exclude at  
243 this stage, though, that IRt<sup>Phox2b</sup> encompasses two subtypes of *Phox2b*<sup>+</sup> neurons, one premotor and  
244 the other pre-premotor, in charge of rhythm generation, and that it is the entrainment of the  
245 latter by photostimulation which triggers the rhythmic repetition.

246

247 IRT<sup>Phox2b</sup> and Peri5<sup>Atob1</sup> as well as most of their motor targets, express the pan-autonomic  
248 *Phox2b* transcriptional determinant. Thus, the evolutionary conserved selectivity of *Phox2b* for  
249 neurons involved in homeostasis (54), extends beyond the reflex control of the viscera, including  
250 all sensory-motor loops involved in digestion (17)(55), to the executive control of ingestion,  
251 through the *Phox2b*<sup>+</sup> premotor/motor arm that mobilizes visceral-arch derived muscles. (**Fig. 1**  
252 **and Fig. S1**). The remarkable genetic monotony of these circuits breaks down at the level of the  
253 somatic (*Phox2b*<sup>-</sup>) lingual and hypobranchials motoneurons. These exceptions are to be expected  
254 in the head where the visceral and somatic bodies of the vertebrate animal, *sensu* Romer (56),  
255 must meet and cooperate, at the border of the external world and interior milieu. Indeed, feeding  
256 can be construed as a sequence of somatic (i.e. external or relational) and visceral (i.e. internal or  
257 homeostatic) actions: to take in a substrate from the environment by biting or licking/lapping up,  
258 then to incorporate it in the interior milieu by chewing and swallowing. In these actions, the  
259 hyoid bone act as a weld between visceral and somatic muscles: the suprahyoids, derived from  
260 visceral arch mesoderm and innervated by branchiomotor (*Phox2b*<sup>+</sup>) motoneurons; and the  
261 “hypobranchials” (infrahyoid and lingual) derived from somites and innervated by somatic  
262 (*Phox2b*<sup>-</sup>) motoneurons. Hyoid bone, branchiomic muscles, branchiomotor neurons and  
263 premotor centers Peri5<sup>Atob1</sup> and IRT<sup>Phox2b</sup>, all affiliated to the visceral body — muscles and bones  
264 through their origin in branchial arch mesoderm or neural crest, neurons through their  
265 expression of *Phox2b* — are likely the ancestral agents of feeding behaviors in vertebrates. At the  
266 advent of predatory and terrestrial lifestyles, the *Phox2b*<sup>+</sup> premotor centers must have recruited  
267 elements of the somatic body: the infrahyoid and lingual motoneurons, and their muscle targets,  
268 migrated into the head (57).

269  
270  
271  
272  
273  
274  
275  
276

## Materials and Methods

### Mouse lines

277 The following transgenic mouse lines were used: *Phox2b::Flpo*(32); *Phox2b::Cre*(58),  
278 *vGlut2::Cre*(59), *Atob1::Cre* (13), *Atob1::FRTCre* (13), *Olig3::Cre<sup>ERT2</sup>* (31), *Foxg1<sup>iresCre</sup>*, *RC::FELA*(60)  
279 *Tau::Syp-GFP* (61), *Rosa::nlsLacZ* (also known as *Tau<sup>mGFP</sup>*)(62) and *Ai9* (63). For behavioral  
280 experiments, all mice were produced in a B6D2 background.

281 The *Rosa<sup>FTLG</sup>* mutant mouse line was established at the Institut Clinique de la Souris  
282 (Phenomin-ICS), Illkirch, France). The targeting vector was constructed as follows. A PCR  
283 fragment containing the rat synaptophysin cDNA fused to GFP was cloned by SLIC cloning



284 with a 346 bps double stranded synthetic HSV TK pA followed by an 29 bps homology for the  
285 5' extremity of the 3' Rosa homology arm plus an NsiI site, in an ICS proprietary vector  
286 containing a floxed NeoR-STOP cassette. In the second cloning step, the NeoR cassette was  
287 removed by BamHI and SpeI restriction digests and replaced by SLIC cloning with the cDNA of  
288 tdTomato. The third cloning step introduced, 5' of the floxed tdTomato-STOP cassette, a DNA  
289 fragment containing an *NsiI* site followed by a 29 bps homology for the 3' of the pCAG,  
290 followed by a MCS. The fourth step was the cloning of a FRT-surrounded NeoR-STOP cassette  
291 previously excised from an ICS proprietary vector in the *SmaI* site of the restriction site  
292 introduced in the MCS cassette. Finally, a fifth cloning step comprised the excision of a 7.8 kb  
293 fragment containing the whole FRT-NeoR-STOP-FRT LoxP-TdTomato-STOP-LoxP Syn-YFP  
294 cassette by a *NsiI* digest and its subcloning via SLIC cloning in an ICS proprietary vector  
295 containing a pCAG (Chicken b-actin promoter preceded by a CMV enhancer) and both 5' and 3'  
296 Rosa homology arms. The linearized construct was electroporated in C57BL/6N mouse  
297 embryonic stem (ES) cells (ICS proprietary line). After G418 selection, targeted clones were  
298 identified by long-range PCR and further confirmed by Southern blot with an internal (Neo)  
299 probe and a 5' external probe. One positive ES cell clone was validated by karyotype spreading  
300 and microinjected into BALB/c blastocysts. Resulting male chimeras were bred with wild type  
301 C57BL/6N females. Germline transmission was achieved in the first litter.

302

### 303 *Housing*

304 Animals were group-housed with free access to food and water in controlled temperature  
305 conditions and exposed to a conventional 12-h light/dark cycle. Experiments were performed on  
306 embryos at embryonic (E) days E11.5-17.5, neonate pups at postnatal day 2-8 (P2-8) and adult  
307 (P30-56) animals of either sex. All procedures were approved by the French Ethical Committee  
308 (authorization 26763-2020022718161012) and conducted in accordance with EU Directive  
309 2010/63/EU. All efforts were made to reduce animal suffering and minimize the number of  
310 animals.

311

### 312 **Viral vectors for tracing, optogenetic and photometry experiments**

313 For anterograde tracing from Peri5<sup>Atab1</sup> and IRT<sup>lhx2b</sup> we injected unilaterally 250 nl of a Cre-  
314 dependent AAV2/8-hSyn-FLEX-mGFP-2A-Synaptophysin-mRuby (Titer: 1.3×10<sup>12</sup> vg/ml, Viral  
315 Core Facility Charité).

316 For retrograde trans-synaptic tracing from muscles we injected unilaterally 50 to 100 nl of a 1:1  
317 viral cocktail comprised of RV-B19-ΔG-mCherry or RV-B19-ΔG-GFP (titer: 1.3x10<sup>9</sup> and 5.8x10<sup>8</sup>

318 TU/ml respectively, Viral Vector Core - Salk Institute for Biological studies) and a HSV-hCMV-  
319 YFP-TVA-B19G (titer:  $3 \times 10^8$  TU/ml, Viral Core MIT McGovern Institute).

320 For retrograde tracing from  $IRT^{Phox2b}$  we injected unilaterally 250 nl of a Cre-dependent AAV1/2-  
321 Syn-flex-nGToG-WPRE3 (Titer:  $8.1 \times 10^{11}$  viral genomes (vg)/ml, Viral Core Facility Charité).  
322 Two weeks later we injected EnvA-RV-B19- $\Delta$ G-mCherry (Titer:  $3.1 \times 10^8$  vg/ml, Viral Vector  
323 Core, Salk Institute for Biological studies).

324 For optogenetic and photometry experiments we respectively injected 250 nl of AAV1/2-Ef1a-  
325 DIO-stCoChR-P2A-mScarlet (titer:  $3 \times 10^{13}$  vg/ml, kind gift from O. Yzhar) or 250 nl of AAV1-  
326 syn-FLEX-jGCaMP7s-WPRE (titer:  $1 \times 10^{12}$  vg/ml Addgene #104487-AAV1).

327

## 328 **Surgical procedures**

### 329 *Stereotaxic injections and implants*

330 All surgeries were conducted under aseptic conditions using a small animal digital stereotaxic  
331 instrument (David Kopf Instruments). Mice were anesthetized with isoflurane (3.5% at 1 l/min  
332 for induction and 2-3% at 0.3 l/min for maintenance). Buprenorphine (0.025 mg/kg) was  
333 administered subcutaneously for analgesia before surgery. A feed-back-controlled heating pad  
334 was used to maintain the animal temperature at 36°C. Anesthetized animals were placed in a  
335 stereotaxic frame (Kopf), a 100  $\mu$ l injection of lidocaine (2%) was made under the skin covering  
336 the skull, after which a small incision was made in the scalp and burr-free holes were drilled in  
337 the skull to expose the brain surface at the appropriate stereotaxic coordinates [anterior-posterior  
338 (AP) and medial-lateral (ML) relative to bregma; dorsal-ventral (DV) relative to brain surface at  
339 coordinate (in mm)]: -4.9 AP, 1.2 ML, 4.0 DV to target the  $Peri5^{Atoh1}$  neurons; -6.7 AP, 0.5 ML,  
340 4.2 DV to target the  $IRT^{Phox2b}$  neurons. A 0.5 ML coordinate was selected for virus deliveries to  
341 the  $IRT^{Phox2b}$  to circumvent the potential infection of nTS neurons along the injecting pipette track,  
342 a 4.0 DV coordinate was selected for virus deliveries to the  $Peri5^{Atoh1}$  to target the center of Mo5.  
343 Viral vectors were delivered using glass micropipettes (tip diameter ca. 100 $\mu$ m) backfilled with  
344 mineral oil connected to a pump (Legato 130, KD Scientific, Phymep, France) via a custom-  
345 made plunger (Phymep, France). The injector tip was lowered an additional 0.1 mm below the  
346 target site and then raised back to the target coordinate before infusion started (flow of 25  
347 nl/min) to restrict virus diffusion to the site of injection and prevent leakages along the needle  
348 track. After infusion, the injection pipette was maintained in position for 10 minutes, then raised  
349 by 100  $\mu$ m increments to retract the pipet from the brain. For optogenetic and photometry  
350 experiments, 200  $\mu$ m core optic fibers (0.39 NA and 0.57 NA respectively) (Smart Laser Co.,  
351 Ltd) were implanted following vector injections,  $\sim$ 500 $\mu$ m above the sites of interest (-4.9 AP, 1.2

352 ML, 3.0 DV for Peri5<sup>Atah1</sup>; -6.7 AP, 0.9 ML, 3.6 DV for IRT<sup>Pbox2b</sup>. The optic fibers were secured  
353 via a ceramic ferrule to the skull by light-cured dental adhesive cement (Tetric Evoflow, Ivoclar  
354 Vivadent). Mice recovered from anesthesia on a heating pad before being placed, and monitored  
355 daily, in individual cages.

356

### 357 *Intramuscular injections*

358 All surgeries were conducted under aseptic conditions on P2 neonates anesthetized by  
359 deep hypothermia. For induction, pups were placed in latex sleeves gently buried in crushed ice  
360 for 3-5 minutes and maintenance (up to 15 min) was achieved by placing anesthetized pups on a  
361 cold pack (3-4°C). Following small incisions of the skin to expose the targeted muscles, 0.5 µl of  
362 the viral cocktail (or 0.5% Cholera toxin subunit B (CTB) (List Labs) for labeling of the  
363 infrahyoids) were injected via a pneumatic dispense system (Picospritzer) connected to a glass  
364 pipette (tip diameter ca. 0.1 mm) mounted on a 3D micromanipulator to guide insertion in the  
365 desired muscle. Typically, 5-10 pressure pulses (100 ms, 3-5 bars) were delivered while muscular  
366 filling was checked visually by the spreading of Fast-Green (0.025%) added to the viral solution.  
367 The pipette was withdrawn and the incision irrigated with physiological saline and closed using  
368 10-0 gage suture (Ethilon). The mouse was placed on a heat pad for recovery and returned to the  
369 mother. Six days post-injection (4 days for CTB), pups were deeply anesthetized, transcardially  
370 perfused with 4% paraformaldehyde (PFA) in phosphate-buffered saline (PBS), and the brains  
371 was dissected out and post-fixed overnight in 4% PFA, and cryoprotected in 15% sucrose in PBS  
372 and were stored at -80°C.

373

## 374 **Histology**

### 375 *Immunofluorescence*

376 Depending on the stage, the brain was analyzed in whole embryos dissected out of the  
377 uterine horns up to E16.5, dissected out from decapitated embryos from E17.5 to P0 or, after  
378 P0, dissected in cold PBS from euthanized animals perfused with cold PBS followed by 4%  
379 paraformaldehyde. Brains or embryos were post-fixed in 4% paraformaldehyde overnight at 4 °C,  
380 rinsed in PBS and cryoprotected in 15% sucrose overnight at 4°C. Tissues were then frozen in  
381 Tissue-Tek® O.C.T. compound for cryo-sectioning (14-30 µm) on a CM3050s cryostat (Leica).  
382 Sections were washed for 1 hour in PBS and incubated in blocking solution (5% calf serum in  
383 0.5% Triton-X100 PBS) containing the primary antibody, applied to the surface of each slide  
384 (300 µl per slide) placed in a humidified chamber on a rotating platform. Incubation was for 4-8  
385 hours at room temperature followed by 4°C overnight. Sections were washed in PBS (3 x 10

386 minutes), then incubated with the secondary antibody in blocking solution for 2 hours at room  
387 temperature, then washed in PBS (3 x 10 minutes), air-dried, and mounted under a cover slip  
388 with fluorescence-mounting medium (Dako). Primary antibodies used were: goat anti-Phox2b  
389 (RD system AF4940, diluted 1:100), rabbit anti-peripherin (Abcam ab4666, 1:1000), guinea-pig  
390 anti-Lmx1b (Müller et al.,2002, 1:1000), goat anti-ChAT (Millipore AB144p), 1:100), chicken anti-  
391  $\beta$ Gal (Abcam, ab9361, 1:1000), chicken anti-GFP (Aves labs, GFP-1020,1:1000), goat anti-ChAT  
392 (Millipore, AB144p, 1:100), rabbit anti-GFP (Invitrogen, A11122, 1:1000), rabbit anti-Phox2b  
393 (Pattyn et al., 1997,1:500), rat anti-RFP (Chromotek, 5F8, 1:1000), goat anti-CTB (List Labs,  
394 #703, 1:500). All secondary antibodies were used at 1:500 dilution: donkey anti-chicken 488  
395 (Jackson laboratories, 703-545-155), donkey anti-chicken Cy5 (Jackson laboratories, 703-176-  
396 155), donkey anti-goat Cy5 (Jackson laboratories, 705-606-147), donkey anti-rabbit 488 (Jackson  
397 laboratories, 711-545-152) donkey anti-rabbit Cy5 (Jackson laboratories, 712-165-153), donkey  
398 anti-rat Cy3 (Jackson laboratories, 711-495-152), donkey anti-Guinea pig Cy3(706-165-148).  
399 Epifluorescence images were acquired with a NanoZoomer S210 digital slide scanner  
400 (Hamamatsu Photonics) and confocal images with a Leica SP5 confocal microscope (Leica).  
401 Pseudocoloring, image brightness and contrast were adjusted using Adobe Photoshop and  
402 ImageJ.

403

#### 404 *In Situ Hybridization and immunohistochemistry*

405 For the *Atob1* probe, primers containing SP6 and T7 overhangs were used to amplify a  
406 607 bp region from a plasmid containing the full length *Atob1* CDS. The purified amplicon was  
407 then used as the template for antisense probe synthesis with T7 RNA polymerase using the  
408 following primers: Forward Primer: 5'-CGATTTTGGGTGACACTATAGAAATCAA-  
409 CGCTCTGTCGGAGTT-3'; Reverse Primer: 5'-  
410 CTAATACGACTCACTATAGGGACAGAGGAAGGGGAT-TGGAAGAG -3'. To generate  
411 the *Cited1* probe, a 687 bp fragment of the murine *Cited1* gene was amplified from E13.5 mouse  
412 brain cDNA (superscript III kit, Invitrogen) and cloned into pGEM-T vector (Promega), using  
413 the following primers: Forward Primer: 5'-TGGGGGGCTTAAGAGCCCGG-3'; Reverse  
414 Primer: 5'-AGGTGAGGGGTAGGATGCAG-3. pGEM clones were linearized with NotI and  
415 transcribed with SP6 or T7 RNA polymerase using the DIG RNA labelling Kit (Roche 1277073)  
416 to generate antisense or sense probes. In situ hybridization was performed on 14  $\mu$ m thick cryo-  
417 sections. Sections were washed for 10 min in PBS prepared in DEPC-treated water, then washed  
418 in RIPA buffer (150 mM NaCl, 1% NP-40, 0.5% Na-deoxycholate, 0.1% SDS, 1 mM EDTA, 50  
419 mM Tris, pH 8.0) for 20 min, post fixed in 4% paraformaldehyde for 15 min followed by rinses

420 in PBS (3 X 10 min). Whenever ISH was to be followed by an immunohistochemical reaction,  
421 slides were incubated for 30 minutes in a mixture of 100% ethanol and 0.5% H<sub>2</sub>O<sub>2</sub>, washed in  
422 PBS (3 X 10 mins), then incubated in Triethanolamine containing 0.25% acetic acid for 15  
423 minutes and washed again in PBS (3 X 10 mins). Antisense RNA probes were diluted in 200µl  
424 hybridization buffer (5 x SSC, 10% dextran sulfate, 500µg/mL Herring sperm DNA, 250µg/mL  
425 Yeast-RNA, 50% formamide) and denatured at 95°C for 5 minutes, cooled briefly on ice, then  
426 diluted at 100-200ng/ml in 17ml hybridization buffer for incubation in slide mailers, at 70°C  
427 overnight. The next day, slides were washed for 1 hour at 70°C in 2 X SSC, 50% formamide and  
428 0.1% Tween 20 and for 1 hour in 0.2 X SSC at 70°C. Slides were washed in B1 buffer (0.1M  
429 Maleic acid; pH 7.5, 0.15M NaCl, 0.1% Tween 20), 3 X10 min. The sections were then blocked  
430 for 1 h at room temperature by incubation in blocking buffer (B1 buffer supplemented with 10%  
431 heat-inactivated fetal calf serum). The blocking solution was replaced by alkaline phosphatase-  
432 conjugated anti-DIG antibody (Roche diagnostics, 11093274910) diluted 1:200 in the blocking  
433 buffer and sections were incubated overnight at 4°C under cover slip. The following day the  
434 slides were rinsed in B1 buffer (3 X 10 min), equilibrated with B3 buffer (0.1 M Tris pH 9.5, 0.1  
435 M NaCl, 50 mM MgCl<sub>2</sub>, 0.1% Tween 20) for 30 min and colorimetric detection of the  
436 digoxigenin-labeled probe was performed with NBT-BCIP substrate for alkaline phosphatase  
437 (Thermo Scientific). The reaction was stopped by washing the slides in PBS-0.1% Tween 20 (2 X  
438 5 min) and fixing in 4% paraformaldehyde for 15 min. Sections were then washed in PBS-0.1%  
439 Tween 20 for 5 min each. Sections were incubated in blocking buffer (10% fetal calf serum  
440 diluted in 0.1% Tween 20 in PBS) for 1 hour at room temperature, then in blocking buffer  
441 containing the primary antibody at 4°C overnight. The next day, slides were washed for 10 min  
442 and biotinylated secondary antibody (diluted at 1:200 in blocking buffer) was applied for 2h at  
443 room temperature and peroxidase enzyme detection of biotinylated antibody was carried out as  
444 per manufacturer's guidelines with the Vectastain Elite ABC kits (PK-6101 and PK-4005; Vector  
445 Laboratories), followed by color development using 3, 3'-Diaminobenzidine (SIGMA FAST  
446 D4293-50SET). The reaction was stopped by washing the slides for 2 X 5 min in Milli-Q water,  
447 then sections were allowed to air-dry completely before mounting with Aquatex (Sigma Aldrich)  
448 for microscopy. Hybridized sections were imaged with a Leica DFC420C camera mounted on a  
449 Leica DM5500B microscope.

450

## 451 **Data Analysis of histology**

452

453 *Counts of premotor neurons and Lmx1b neurons*

454 Cells expressing *mCherry* and/or *nlsLacZ*, were counted in a spheroid of fixed dimension and  
455 position delimitating the ipsilateral dorsal IRT, drawn on the approximately 7 sections that were in  
456 register with the compact formation of MoA; n=4 animals,  $87 \pm 20$  SEM premotor neurons per  
457 animal.

458 Cells expressing *Phox2b* and/or *Lmx1b* were counted as above from one side; n=3 animals,  
459  $1321 \pm 46$  SEM neurons per animal.

460

#### 461 *Inputs to IRT<sup>Phox2b</sup>*

462 Images of sections were aligned to the Allen Brain Atlas using QuickNII (64)  
463 (<https://www.nitrc.org/projects/quicknii>). Labelled neurons were manually annotated as IRT  
464 seed neurons (GFP<sup>+</sup> mCherry<sup>+</sup>) or monosynaptic input neurons (mCherry<sup>+</sup>) in ImageJ. The pixel  
465 coordinates of identified input neurons were transformed into Allen Brain Atlas coordinates as  
466 previously described (65)(66) and corresponding Allen Brain Atlas brain structures identified  
467 using CellfHelp (<https://github.com/PolarBean/CellfHelp>). Data from individual replicates were  
468 tabulated, normalized and pooled to generate a list of brain regions that provide monosynaptic  
469 input to IRT<sup>Phox2b</sup>. The display bar graph excludes any input below 0.3%.

470

## 471 **Behavioral experiments**

### 472 *Timing and training*

473 All behavioral experiments started four weeks after the viral injection. Two weeks after surgery  
474 animals were habituated to head-fixation through sessions of increasing duration (2 minutes)  
475 every other day, starting at 2 minutes on day 0 and a final duration of 10 minutes on day 5 which  
476 corresponded to the duration of recording sessions. Animals were given condensed milk as a  
477 reward after each session. Animals used for photometry experiments were introduced to a lick  
478 port during habituation. During acquisition or manipulation animals were head-fixed within a  
479 5cm tube, illuminated from below and above by an LED light. Animals were water deprived for  
480 12 hours prior to photometry experiments.

481

### 482 *Optogenetics*

483 For optogenetic photostimulation of st-CoChR expressing neurons, fiber optic canulae were  
484 connected to a 473-nm DPSS laser (CNI, Changchun, China) through a patch cable (200  $\mu$ m,  
485 0.37 NA) and a zirconia mating sleeve (Thorlabs). Laser output was controlled using a pulse  
486 generator (accupulser, WPI), which delivered single continuous light pulses of 50-1000 ms. Light  
487 output through the optical fibers was adjusted to  $\sim 5$  mW at the fiber tip using a digital power



488 meter (PM100USB, Thorlabs), to prevent heat. All light stimuli were separated by minimal  
489 periods of 10s. Laser output was digitized at 1kHz by a NI USB-6008 card (National  
490 Instruments) and acquired using a custom-written software package (Elphy by G Saddoc,  
491 <https://www.unic.cnrs.fr/software.html>).

492

#### 493 *Photometry*

494 For photometry experiments, a single site fiber photometry system (Doric Lenses Inc, Canada)  
495 was used to measure the excited isobestic (405nm) and calcium-dependent fluorescence of  
496 jGCaMP7s (465nm). Doric neuroscience studio software system (Doric Lenses Inc, Canada) was  
497 used to operate the photometry hardware and acquire the photometry signal. Briefly, using the  
498 “lock in mode” function, 465 nm and 405nm LEDs were sinusoidally modulated at 208.616 Hz  
499 and 572.205 Hz respectfully (to avoid any electrical system harmonics at 50/60 Hz, 100/120 Hz,  
500 200/240 Hz) at an intensity of 30  $\mu$ W and coupled to a patch cable (diam. 200 $\mu$ m, 0.57nA) after  
501 passing through an optical assembly (iLFMC4, Doric Lenses Inc, Canada). The modulated  
502 excitation signal was then directed through an implanted fiber optic cannula (diam. 200 $\mu$ m,  
503 0.57NA) onto the IRt via the mated patch cable and the emitted signal was then returned via the  
504 same patch cable to a fluorescence detector head, mounted on the optical assembly and  
505 amplified. The raw detected signal was acquired at 12 kHz and then demodulated in real time to  
506 reconstitute the excited isobestic (405nm) and calcium dependent GCaMP (465nm) signals.  
507 Contact between the tongue and the lick port during spontaneous licking bouts were registered  
508 via a SEN-1204 capacitance sensor (Sparkfun) connected to Arduino Uno R3 microcontroller  
509 board (Arduino) and acquired at 12 kHz via the Doric fibre photometry console.

510

#### 511 *Automated markless pose estimation*

512 Spontaneous and light-evoked licking sequences were filmed at portrait (Fig. 4A) and profile  
513 angles (Fig. 4D) with a CMOS camera (Jai GO-2400-C-USB) synchronized by a 5V TTL pulse.  
514 The acquired frames (800 x 800 pixels, 120 fps,) were streamed to a hard disk using 2ndlook  
515 software (IO Industries) and compressed using an MPEG-4 codec. Portrait views were used for  
516 video tracking of optogenetically-evoked oromotor movements, while profile views were  
517 preferably used for photometry experiments, to optimize detection of the tongue, which was  
518 partially obscured by the nearby lick port when filmed from the portrait angle.

519

520 Using DeepLabCut (version 2.0.7,(67)), we trained 2 ResNet-50 based neural networks to identify  
521 the tip of the tongue and lower jaw from portrait and landscape views (**Fig. 4 A,B,D**). The

522 “portrait” network was trained on a set of 264 frames (800 x 800 pixels) derived from 11 videos  
523 of 6 different mice for >400,000 iterations, reporting a train error of 1.85 pixels and test error of  
524 6.79 pixels upon evaluation. The “profile” network was trained on a set of 90 frames (800 x 800  
525 pixels) from 4 videos of 4 different mice for >800,000 iterations reporting a train error of 1.66  
526 pixels and test error of 4.57 pixels upon evaluation. These networks were then used to generate  
527 Cartesian estimates for the Y-axis position of the jaw and tongue for experimental videos.

528

## 529 **Data analysis**

530 We analyzed behavioral and fiber photometry data using custom written Python scripts (Python  
531 version 3.7, Python Software Foundation). In most instances, mice underwent multiple sessions  
532 of the same experiment. These sessions were then averaged and treated as a single replicate for  
533 that animal. Fiber photometry and photostimulation data was resampled to 120 Hz to match the  
534 acquisition rate of video recordings.

535

### 536 *Fiber photometry*

537 Photometry data was analyzed as previously described (44). Both 465 nm and 405 nm signals  
538 were first low-pass filtered. The 465 nm signals was then normalized using the function  $\Delta F/F =$   
539  $(F - F_0) / F_0$ , in which F is the 465 nm signal, and F<sub>0</sub> is the least-squared mean fit of the 405 nm  
540 signal. Responses (photometry, jaw and tongue) were then aligned to the peak of the first  
541 derivative of jaw opening events that were active during a lick bout.

542

### 543 *Statistical analysis of fiber photometry data*

544 For each recording session in one animal, correlations between lick port contact and calcium  
545 signals were computed for all possible shifts at 120Hz spanning from -10s to +10s, producing  
546 one curve per session (Fig 3G). A null correlation curve per recording session was constructed by  
547 performing the same computation after shuffling the lick port contact (Fig 3G). All recording  
548 sessions and all null correlation curves were averaged for each animal, to produce a single mean  
549 shifted correlation curve and a null mean correlation curve per animal (Fig. S4). The maxima  
550 values of both shifted and null mean curves were retrieved for each animal (n=4). A paired t-test  
551 between these values indicated a shifted correlation between both signals.

552

### 553 *Normalisation of jaw and tongue pose estimation*

554 Cartesian pixel estimates of the jaw and tongue were corrected to a 5 mm scale bar within the  
555 video frame, and smoothed using the Savitzky-Golay filter. For optogenetic experiments, the jaw

556 position was normalized to its averaged location 50-100 ms prior to stimulation. For fiber  
557 photometry experiments, the jaw position was normalized to its average location during quiescent  
558 periods between 1-3 s long. As the tongue was only present during stimulation of IRT<sup>Phox2b</sup> or  
559 spontaneous lapping, we normalized the tongue distance empirically by observing the first  
560 detected instance of tongue protrusion that succeeded jaw-opening events. All positional  
561 estimates of the tongue that had a probability < 5 % (67) were then set to the empirically  
562 determined baseline to filter out aberrant estimates of the tongue position during periods of the  
563 recording where it was not visible. Fiber photometry

564

### 565 *Licking frequency*

566 For data collected during optogenetic experiments we first obtained the onsets of each lick  
567 during a 1000 ms stimulation window. These onsets were identified as the peaks of the first  
568 derivative of each lick within a lick bout. Lick frequency was then calculated as the number of lick  
569 events divided by length of time from the last lick to the first lick within a lick bout. For data  
570 collected during fiber photometry, lick frequency was determined by the number of contact  
571 events of the capacitance sensor divided by the length of time from the last to the first lick within  
572 a lick bout.

573

### 574 *Statistical Analysis*

575 All data are reported as mean  $\pm$  s.e.m (shaded area). P values for independent samples  
576 comparison were performed using a two-tailed Student's t-test.

577

578

579

## 580 **References**

- 581 1. C. J. Herrick, *An Introduction to Neurology* (1918).
- 582 2. A. Torvik, Afferent connections to the sensory trigeminal nuclei, the nucleus of the solitary tract and  
583 adjacent structures; an experimental study in the rat. *The Journal of comparative neurology*. **106**, 51–141  
584 (1956).
- 585 3. J. D. Moore, M. Deschênes, T. Furuta, D. Huber, M. C. Smear, M. Demers, D. Kleinfeld, Hierarchy of  
586 orofacial rhythms revealed through whisking and breathing. *Nature*. **497**, 205–210 (2013).
- 587 4. L. Ruder, R. Schina, H. Kanodia, S. Valencia-Garcia, C. Pivetta, S. Arber, A functional map for diverse  
588 forelimb actions within brainstem circuitry. *Nature*. **590**, 445–450 (2021).
- 589 5. J. D. Moore, D. Kleinfeld, F. Wang, How the brainstem controls orofacial behaviors comprised of  
590 rhythmic actions. *Trends Neurosci*. **37**, 370–380 (2014).
- 591 6. J. B. Travers, L. A. Dinardo, H. Karimnamazi, Motor and Premotor Mechanisms of Licking. *Neuroscience*  
592 & *Biobehavioral Reviews*. **21**, 631–647 (1997).

- 593 7. T. M. Anderson, A. J. Garcia, N. A. Baertsch, J. Pollak, J. C. Bloom, A. D. Wei, K. G. Rai, J. M. Ramirez,  
594 A novel excitatory network for the control of breathing. *Nature*. **536**, 76–80 (2016).
- 595 8. Y. Nakamura, Y. Yanagawa, S. F. Morrison, K. Nakamura, Medullary Reticular Neurons Mediate  
596 Neuropeptide Y-Induced Metabolic Inhibition and Mastication. *Cell Metabolism*. **25**, 322–334 (2017).
- 597 9. E. Stanek, S. Cheng, J. Takatoh, B.-X. Han, F. Wang, Monosynaptic premotor circuit tracing reveals  
598 neural substrates for oro-motor coordination. *eLife*. **3**, e02511 (2014).
- 599 10. J. Bouvier, V. Caggiano, R. Leiras, V. Caldeira, C. Bellardita, K. Balueva, A. Fuchs, O. Kiehn,  
600 Descending Command Neurons in the Brainstem that Halt Locomotion. *Cell*. **163**, 1191–1203 (2015).
- 601 11. J. M. Cregg, R. Leiras, A. Montalant, P. Wanken, I. R. Wickersham, O. Kiehn, Brainstem neurons that  
602 command mammalian locomotor asymmetries. *Nat Neurosci*. **23**, 730–740 (2020).
- 603 12. M. Thoby-Brisson, M. Karlén, N. Wu, P. Charnay, J. Champagnat, G. Fortin, Genetic identification of an  
604 embryonic parafacial oscillator coupling to the preBötzing complex. *Nature neuroscience*. **12**, 1028–  
605 1035 (2009).
- 606 13. P.-L. Ruffault, F. d’Autréaux, J. A. Hayes, M. Nomaksteinsky, S. Autran, T. Fujiyama, M. Hoshino, M.  
607 Hägglund, O. Kiehn, J.-F. Brunet, G. Fortin, C. Goridis, The retrotrapezoid nucleus neurons expressing  
608 Atoh1 and Phox2b are essential for the respiratory response to CO<sub>2</sub>. *eLife*. **4** (2015).
- 609 14. P. Li, W. A. Janczewski, K. Yackle, K. Kam, S. Pagliardini, M. A. Krasnow, J. L. Feldman, The  
610 peptidergic control circuit for sighing. *Nature*. **530**, 293–297 (2016).
- 611 15. M. B. Reilly, C. Cros, E. Varol, E. Yemini, O. Hobert, Unique homeobox codes delineate all the neuron  
612 classes of *C. elegans*. *Nature*. **584**, 595–601 (2020).
- 613 16. R. Yuste, M. Hawrylycz, N. Aalling, A. Aguilar-Valles, D. Arendt, R. Armañanzas, G. A. Ascoli, C.  
614 Bielza, V. Bokharaie, T. B. Bergmann, I. Bystron, M. Capogna, Y. Chang, A. Clemens, C. P. J. de Kock,  
615 J. DeFelipe, S. E. Dos Santos, K. Dunville, D. Feldmeyer, R. Fiath, G. J. Fishell, A. Foggetti, X. Gao, P.  
616 Ghaderi, N. A. Goriounova, O. Güntürkün, K. Hagihara, V. J. Hall, M. Helmstaedter, S. Herculan-  
617 Houzel, M. M. Hilscher, H. Hirase, J. Hjerling-Leffler, R. Hodge, J. Huang, R. Huda, K. Khodosevich, O.  
618 Kiehn, H. Koch, E. S. Kuebler, M. Kühnemund, P. Larrañaga, B. Lelieveldt, E. L. Louth, J. H. Lui, H. D.  
619 Mansvelder, O. Marin, J. Martinez-Trujillo, H. M. Chameh, A. N. Mohapatra, H. Munguba, M.  
620 Nedergaard, P. Némec, N. Ofer, U. G. Pfisterer, S. Pontes, W. Redmond, J. Rossier, J. R. Sanes, R. H.  
621 Scheuermann, E. Serrano-Saiz, J. F. Staiger, P. Somogyi, G. Tamás, A. S. Tolia, M. A. Tosches, M. T.  
622 García, C. Wozny, T. V. Wuttke, Y. Liu, J. Yuan, H. Zeng, E. Lein, A community-based transcriptomics  
623 classification and nomenclature of neocortical cell types. *Nat Neurosci*. **23**, 1456–1468 (2020).
- 624 17. J.-F. Brunet, A. Pattyn, Phox2 genes - from patterning to connectivity. *Current opinion in genetics &*  
625 *development*. **12**, 435–440 (2002).
- 626 18. A. Pattyn, M. Hirsch, C. Goridis, J. F. Brunet, Control of hindbrain motor neuron differentiation by the  
627 homeobox gene Phox2b. *Development*. **127**, 1349–1358 (2000).
- 628 19. A. Pattyn, C. Goridis, J. F. Brunet, Specification of the central noradrenergic phenotype by the homeobox  
629 gene Phox2b. *Mol Cell Neurosci*. **15**, 235–243 (2000).
- 630 20. L. Li, B. Tasic, K. D. Micheva, V. M. Ivanov, M. L. Spletter, S. J. Smith, L. Luo, Visualizing the  
631 distribution of synapses from individual neurons in the mouse brain. *PLoS one*. **5**, e11503 (2010).
- 632 21. S. Kitamura, T. Nishiguchi, J. Okubo, K. L. Chen, A. Sakai, An HRP study of the motoneurons supplying  
633 the rat hypobranchial muscles: central localization, peripheral axon course and soma size. *The Anatomical*  
634 *record*. **216**, 73–81 (1986).
- 635 22. I. R. Wickersham, D. C. Lyon, R. J. O. Barnard, T. Mori, S. Finke, K.-K. Conzelmann, J. A. T. Young, E.  
636 M. Callaway, Monosynaptic restriction of transsynaptic tracing from single, genetically targeted neurons.  
637 *Neuron*. **53**, 639–647 (2007).

- 638 23. K. W. Ashwell, The adult mouse facial nerve nucleus: morphology and musculotopic organization. *J Anat.*  
639 **135**, 531–538 (1982).
- 640 24. C. F. Hinrichsen, C. D. Watson, The facial nucleus of the rat: representation of facial muscles revealed by  
641 retrograde transport of horseradish peroxidase. *The Anatomical record.* **209**, 407–415 (1984).
- 642 25. H. Meessen, J. Olszewski, *Cytoarchitectonic Atlas of the Rhombencephalon of the Rabbit* (Karger, Basel,  
643 1949).
- 644 26. P. Morquette, R. Lavoie, M.-D. Fhima, X. Lamoureux, D. Verdier, A. Kolta, Generation of the  
645 masticatory central pattern and its modulation by sensory feedback. *Progress in Neurobiology.* **96**, 340–  
646 355 (2012).
- 647 27. L. R. Hernandez-Miranda, P.-L. Ruffault, J. C. Bouvier, A. J. Murray, M.-P. Morin-Surun, N. Zampieri, J.  
648 B. Cholewa-Waclaw, E. Ey, J.-F. Brunet, J. Champagnat, G. Fortin, C. Birchmeier, Genetic identification  
649 of a hindbrain nucleus essential for innate vocalization. *Proceedings of the National Academy of Sciences*  
650 *of the United States of America.* **114**, 8095–8100 (2017).
- 651 28. D. J. Van Daele, M. D. Cassell, Multiple forebrain systems converge on motor neurons innervating the  
652 thyroarytenoid muscle. *Neuroscience.* **162**, 501–524 (2009).
- 653 29. M. E. van der Heijden, H. Y. Zoghbi, Loss of Atoh1 from neurons regulating hypoxic and hypercapnic  
654 chemoresponses causes neonatal respiratory failure in mice. *eLife.* **7**, 937 (2018).
- 655 30. M. A. Sieber, R. Storm, M. Martinez-de-la-Torre, T. Müller, H. Wende, K. Reuter, E. Vasyutina, C.  
656 Birchmeier, Lbx1 acts as a selector gene in the fate determination of somatosensory and viscerosensory  
657 relay neurons in the hindbrain. *The Journal of neuroscience : the official journal of the Society for*  
658 *Neuroscience.* **27**, 4902–4909 (2007).
- 659 31. R. Storm, J. Cholewa-Waclaw, K. Reuter, D. Bröhl, M. Sieber, M. Treier, T. Müller, C. Birchmeier, The  
660 bHLH transcription factor Olig3 marks the dorsal neuroepithelium of the hindbrain and is essential for the  
661 development of brainstem nuclei. *Development.* **136**, 295–305 (2009).
- 662 32. M.-R. Hirsch, F. d’Auréaux, S. M. Dymecki, J.-F. Brunet, C. Goridis, A Phox2b::FLPo transgenic mouse  
663 line suitable for intersectional genetics. *Genesis (New York, N.Y. : 2000).* **51**, 506–514 (2013).
- 664 33. K. T. Beier, E. E. Steinberg, K. E. DeLoach, S. Xie, K. Miyamichi, L. Schwarz, X. J. Gao, E. J. Kremer,  
665 R. C. Malenka, L. Luo, Circuit Architecture of VTA Dopamine Neurons Revealed by Systematic Input-  
666 Output Mapping. *Cell.* **162**, 622–634 (2015).
- 667 34. T. Terashima, Y. Kishimoto, T. Ochiishi, Musculotopic organization in the motor trigeminal nucleus of  
668 the reeler mutant mouse. *Brain Res.* **666**, 31–42 (1994).
- 669 35. E. Shohara, A. Sakai, Localization of motoneurons innervating deep and superficial facial muscles in the  
670 rat: a horseradish peroxidase and electrophysiologic study. *Experimental Neurology.* **81**, 14–33 (1983).
- 671 36. T. Terashima, Y. Kishimoto, T. Ochiishi, Musculotopic organization of the facial nucleus of the reeler  
672 mutant mouse. *Brain Res.* **617**, 1–9 (1993).
- 673 37. S. E. Widmalm, P. A. Nemeth, M. M. Ash, J. H. Lillie, The anatomy and electrical activity of the platysma  
674 muscle. *Journal of oral rehabilitation.* **12**, 17–22 (1985).
- 675 38. L. D. Aldes, Subcompartmental organization of the ventral (protruder) compartment in the hypoglossal  
676 nucleus of the rat. *The Journal of comparative neurology.* **353**, 89–108 (1995).
- 677 39. J. R. McClung, S. J. Goldberg, Organization of motoneurons in the dorsal hypoglossal nucleus that  
678 innervate the retruder muscles of the tongue in the rat. *Anat Rec.* **254**, 222–230 (1999).
- 679 40. A. W. Crompton, P. Cook, K. Hiiemae, A. J. Thexton, Movement of the hyoid apparatus during chewing.  
680 *Nature.* **258**, 69–70 (1975).

- 681 41. H. Murakami, Rhythmometry on licking rate of the mouse. *Physiology & Behavior*. **19**, 735–738 (1977).
- 682 42. Z. Wiesenfeld, B. Halpern, D. Tapper, Licking behavior: evidence of hypoglossal oscillator. *Science*. **196**,  
683 1122–1124 (1977).
- 684 43. H. Onimaru, I. Homma, A novel functional neuron group for respiratory rhythm generation in the ventral  
685 medulla. *The Journal of neuroscience : the official journal of the Society for Neuroscience*. **23**, 1478–1486  
686 (2003).
- 687 44. T. N. Lerner, C. Shilyansky, T. J. Davidson, K. E. Evans, K. T. Beier, K. A. Zalocusky, A. K. Crow, R. C.  
688 Malenka, L. Luo, R. Tomer, K. Deisseroth, Intact-Brain Analyses Reveal Distinct Information Carried by  
689 SNc Dopamine Subcircuits. *Cell*. **162**, 635–647 (2015).
- 690 45. H. Dana, Y. Sun, B. Mohar, B. K. Hulse, A. M. Kerlin, J. P. Hasseman, G. Tsegaye, A. Tsang, A. Wong,  
691 R. Patel, J. J. Macklin, Y. Chen, A. Konnerth, V. Jayaraman, L. L. Looger, E. R. Schreier, K. Svoboda, D.  
692 S. Kim, High-performance calcium sensors for imaging activity in neuronal populations and  
693 microcompartments. *Nat Methods*. **16**, 649–657 (2019).
- 694 46. T. Komiyama, T. R. Sato, D. H. O’Connor, Y.-X. Zhang, D. Huber, B. M. Hooks, M. Gabitto, K.  
695 Svoboda, Learning-related fine-scale specificity imaged in motor cortex circuits of behaving mice. *Nature*.  
696 **464**, 1182–1186 (2010).
- 697 47. N. Mercer Lindsay, P. M. Knutsen, A. F. Lozada, D. Gibbs, H. J. Karten, D. Kleinfeld, Orofacial  
698 Movements Involve Parallel Corticobulbar Projections from Motor Cortex to Trigeminal Premotor Nuclei.  
699 *Neuron*. **104**, 765-780.e3 (2019).
- 700 48. M. N. Economo, S. Viswanathan, B. Tasic, E. Bas, J. Winnubst, V. Menon, L. T. Graybuck, T. N.  
701 Nguyen, K. A. Smith, Z. Yao, L. Wang, C. R. Gerfen, J. Chandrashekar, H. Zeng, L. L. Looger, K.  
702 Svoboda, Distinct descending motor cortex pathways and their roles in movement. *Nature*. **563**, 79–84  
703 (2018).
- 704 49. N. Li, T.-W. Chen, Z. V. Guo, C. R. Gerfen, K. Svoboda, A motor cortex circuit for motor planning and  
705 movement. *Nature*. **519**, 51–56 (2015).
- 706 50. H. J. Grill, R. Norgren, The taste reactivity test. II. Mimetic responses to gustatory stimuli in chronic  
707 thalamic and chronic decerebrate rats. *Brain Research*. **143**, 281–297 (1978).
- 708 51. J. W. Woods, BEHAVIOR OF CHRONIC DECEREBRATE RATS. *Journal of Neurophysiology*. **27**,  
709 635–644 (1964).
- 710 52. M. A. Rossi, H. E. Li, D. Lu, I. H. Kim, R. A. Bartholomew, E. Gaidis, J. W. Barter, N. Kim, M. T. Cai, S.  
711 H. Soderling, H. H. Yin, A GABAergic nigrotectal pathway for coordination of drinking behavior. *Nat*  
712 *Neurosci*. **19**, 742–748 (2016).
- 713 53. P. Luo, J. Zhang, R. Yang, W. Pendlebury, Neuronal circuitry and synaptic organization of trigeminal  
714 proprioceptive afferents mediating tongue movement and jaw-tongue coordination via hypoglossal  
715 premotor neurons. *European Journal of Neuroscience*. **23**, 3269–3283 (2006).
- 716 54. M. Nomaksteinsky, S. Kassabov, Z. Chettouh, H.-C. Stoeklé, L. Bonnaud, G. Fortin, E. R. Kandel, J.-F.  
717 Brunet, Ancient origin of somatic and visceral neurons. *BMC biology*. **11**, 53 (2013).
- 718 55. A. Pattyn, X. Morin, H. Cremer, C. Goridis, J. F. Brunet, The homeobox gene Phox2b is essential for the  
719 development of autonomic neural crest derivatives. *Nature*. **399**, 366–370 (1999).
- 720 56. A. S. Romer, The Vertebrate as a Dual Animal — Somatic and Visceral. *Evolutionary Biology*, 121–156  
721 (1972).
- 722 57. R. Sambasivan, S. Kuratani, S. Tajbakhsh, An eye on the head: the development and evolution of  
723 craniofacial muscles. *Development*. **138**, 2401–2415 (2011).



- 724 58. F. d'Autréaux, E. Coppola, M.-R. Hirsch, C. Birchmeier, J.-F. Brunet, Homeoprotein Phox2b commands a  
725 somatic-to-visceral switch in cranial sensory pathways. *Proceedings of the National Academy of Sciences*  
726 *of the United States of America*. **108**, 20018–20023 (2011).
- 727 59. L. Vong, C. Ye, Z. Yang, B. Choi, S. Chua, B. B. Lowell, Leptin Action on GABAergic Neurons Prevents  
728 Obesity and Reduces Inhibitory Tone to POMC Neurons. *Neuron*. **71**, 142–154 (2011).
- 729 60. P. Jensen, A. F. Farago, R. B. Awatramani, M. M. Scott, E. S. Deneris, S. M. Dymecki, Redefining the  
730 serotonergic system by genetic lineage. *Nat Neurosci*. **11**, 417–419 (2008).
- 731 61. E. Pecho-Vrieseling, M. Sigrist, Y. Yoshida, T. M. Jessell, S. Arber, Specificity of sensory–motor  
732 connections encoded by Sema3e–PlxnD1 recognition. *Nature*. **459**, 842–846 (2009).
- 733 62. S. Hippenmeyer, E. Vrieseling, M. Sigrist, T. Portmann, C. Laengle, D. R. Ladle, S. Arber, A  
734 developmental switch in the response of DRG neurons to ETS transcription factor signaling. *PLoS*  
735 *biology*. **3**, e159 (2005).
- 736 63. L. Madisen, T. A. Zwingman, S. M. Sunkin, S. W. Oh, H. A. Zariwala, H. Gu, L. L. Ng, R. D. Palmiter,  
737 M. J. Hawrylycz, A. R. Jones, E. S. Lein, H. Zeng, A robust and high-throughput Cre reporting and  
738 characterization system for the whole mouse brain. *Nature neuroscience*. **13**, 133–140 (2010).
- 739 64. I. E. Bjerke, M. Øvsthus, K. A. Andersson, C. H. Blixhavn, H. Kleven, S. C. Yates, M. A. Puchades, J. G.  
740 Bjaalie, T. B. Leegaard, Navigating the Murine Brain: Toward Best Practices for Determining and  
741 Documenting Neuroanatomical Locations in Experimental Studies. *Front. Neuroanat*. **12**, 82 (2018).
- 742 65. B. Dempsey, S. Le, A. Turner, P. Bokinić, R. Ramadas, J. G. Bjaalie, C. Menuet, R. Neve, A. M. Allen,  
743 A. K. Goodchild, S. McMullan, Mapping and Analysis of the Connectome of Sympathetic Premotor  
744 Neurons in the Rostral Ventrolateral Medulla of the Rat Using a Volumetric Brain Atlas. *Front. Neural*  
745 *Circuits*. **11** (2017), doi:10.3389/fncir.2017.00009.
- 746 66. R. U. A. S. Toor, Q.-J. Sun, N. N. Kumar, S. Le, C. M. Hildreth, J. K. Phillips, S. McMullan, Neurons in  
747 the Intermediate Reticular Nucleus Coordinate Postinspiratory Activity, Swallowing, and Respiratory-  
748 Sympathetic Coupling in the Rat. *J. Neurosci*. **39**, 9757–9766 (2019).
- 749 67. A. Mathis, P. Mamidanna, K. M. Cury, T. Abe, V. N. Murthy, M. W. Mathis, M. Bethge, DeepLabCut:  
750 markerless pose estimation of user-defined body parts with deep learning. *Nat Neurosci*. **21**, 1281–1289  
751 (2018).
- 752 68. V. Hatini, X. Ye, G. Balas, E. Lai, Dynamics of placodal lineage development revealed by targeted  
753 transgene expression. *Dev Dyn*. **215**, 332–343 (1999).

754

## 755 Acknowledgments

756 We thank the animal facility of IBENS, the imaging facility of IBENS (supported by grants from  
757 Fédération pour la Recherche sur le Cerveau, Région Ile-de-France DIM NeRF (2009 and 2011)  
758 and France-BioImaging), Ofer Yitzar for the *AAV1-EF1a-DIO-stCoChR-P2A-mScarlet* vector.  
759 The mouse *Rosa<sup>FTLG</sup>* mutant line was established at the Institut Clinique de la Souris (Phenomim-  
760 ICS) in the Genetic Engineering and Model Validation Department. Funding is from  
761 CNRS, École Normale Supérieure, INSERM, Association Nationale pour la Recherche ANR -  
762 15-CE16-0013 (to JFB), Association Nationale pour la Recherche ANR-17-CE16-0006 (to JFB)  
763 and ANR-19-CE16-0029 (to GF), Fondation pour la Recherche Médicale DEQ2000326472 (to

764 JFB), ‘Investissements d’Avenir’ program ANR-10-LABX-54 MEMO LIFE and ANR-11-  
765 IDEX-0001–02 PSL Research University), and Région Ile-de-France (to SS).

766

767

768

769 **Author contributions:**

770 Conceptualization: BD, CG, GF, JFB

771 Investigation: BD, SS, PB, ERH, ZC, SD, SA

772 Formal Analysis: SM, HC, AG

773 Supervision: CG, GF, JFB, JFAP

774 Resources CB

775 Writing BD, GF, JFB

776 **Competing interests:** The authors declare no competing interests.

777 **Data and materials availability:** All data needed to evaluate the conclusions of the paper are  
778 available in the main text or the supplementary materials, or from the corresponding authors  
779 upon reasonable request.

780

781  
782  
783  
784  
785  
786  
787  
788  
789  
790  
791  
792  
793  
794  
795  
796  
797  
798  
799  
800  
801  
802  
803  
804  
805  
806  
807  
808  
809  
810  
811  
812  
813  
814  
815  
816  
817  
818  
819  
820  
821  
822

## Figures

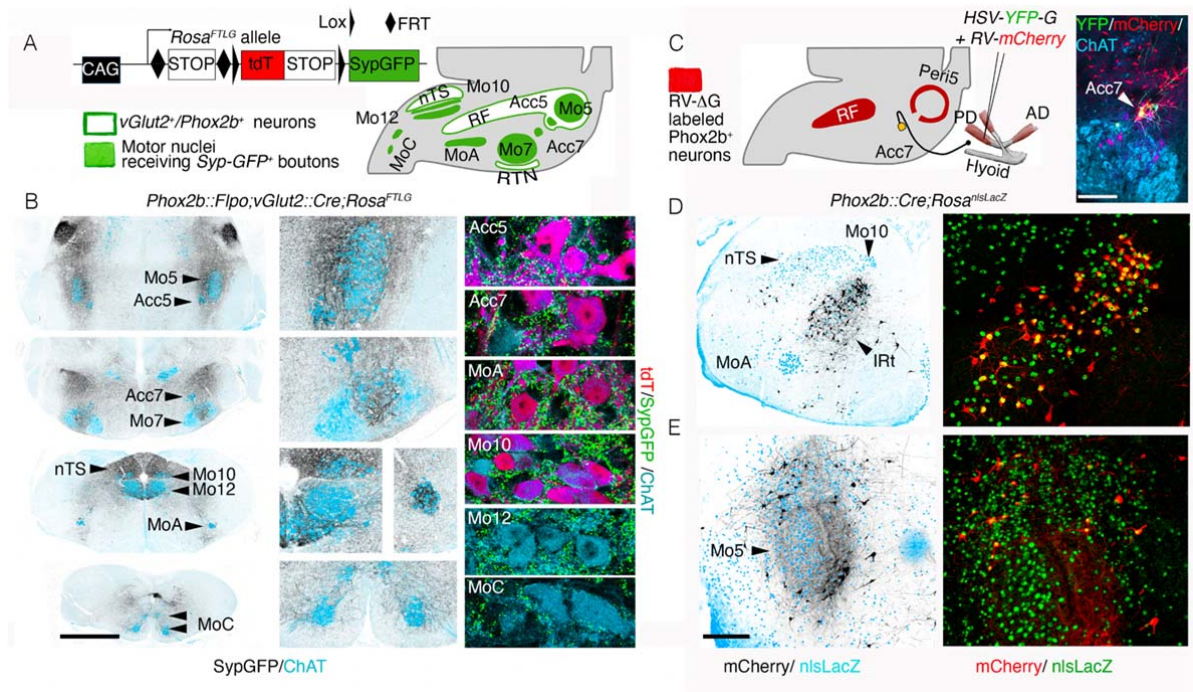

**Fig. 1. Premotor status of reticular formation *Phox2b*<sup>+</sup> interneurons.** (A) *Rosa*<sup>FTLG</sup> allele used for intersectoral transgenic labeling of boutons from *vGlut2/Phox2b* interneurons (left) and schematic of the results (right). (B) Coronal sections through the hindbrain of a *Phox2b::Flpo;vGlut2::Cre;Rosa*<sup>FTLG</sup> mouse at P4, showing synaptic boutons (black) from *vGlut2/Phox2b* interneurons in relation to motor nuclei (ChAT<sup>+</sup>, blue) at low (left), and higher (middle) magnifications, and close ups of boutons (green) on motoneurons (right), which either *Phox2b*<sup>+</sup> (purple) or *Phox2b*<sup>-</sup> (blue). (C) (left) Strategy for mono-synaptically restricted trans-synaptic labeling of premotor neurons from the posterior digastric muscle (PD) in a *Phox2b::Cre;Rosa*<sup>nlacZ</sup> mouse, with G-deleted rabies virus (RV) encoding *mCherry* and complemented by a G-encoding helper HSV virus (*HSV-G-YFP*), and summary of the results. (right panel) The only seed neurons are *Acc7* motoneurons, double-labeled by the *HSV-G* and *RV-mCherry* viruses. (D,E) Coronal sections through the hindbrain at P8 showing labeled premotor neurons (black on the left panels) in the medial IRT (D) and Peri5 (E), which for the most part (72.7%±3.5 SEM, n=4 animals) express *Phox2b* (right panels). AD, anterior digastric; IRT, intermediate reticular formation; nTS, nucleus of the solitary tract; PD, posterior digastric; peri5, peri-trigeminal area; RF, reticular formation; RTN, retrotrapezoid nucleus Scale bars, (B) 1mm for the left column, (C) 250µm, (D,E), 500µm.



823  
824  
825  
826  
827  
828  
829  
830  
831  
832  
833  
834  
835  
836  
837  
838  
839  
840  
841  
842  
843  
844  
845  
846  
847  
848  
849  
850  
851  
852  
853  
854  
855  
856  
857  
858  
859  
860  
861  
862

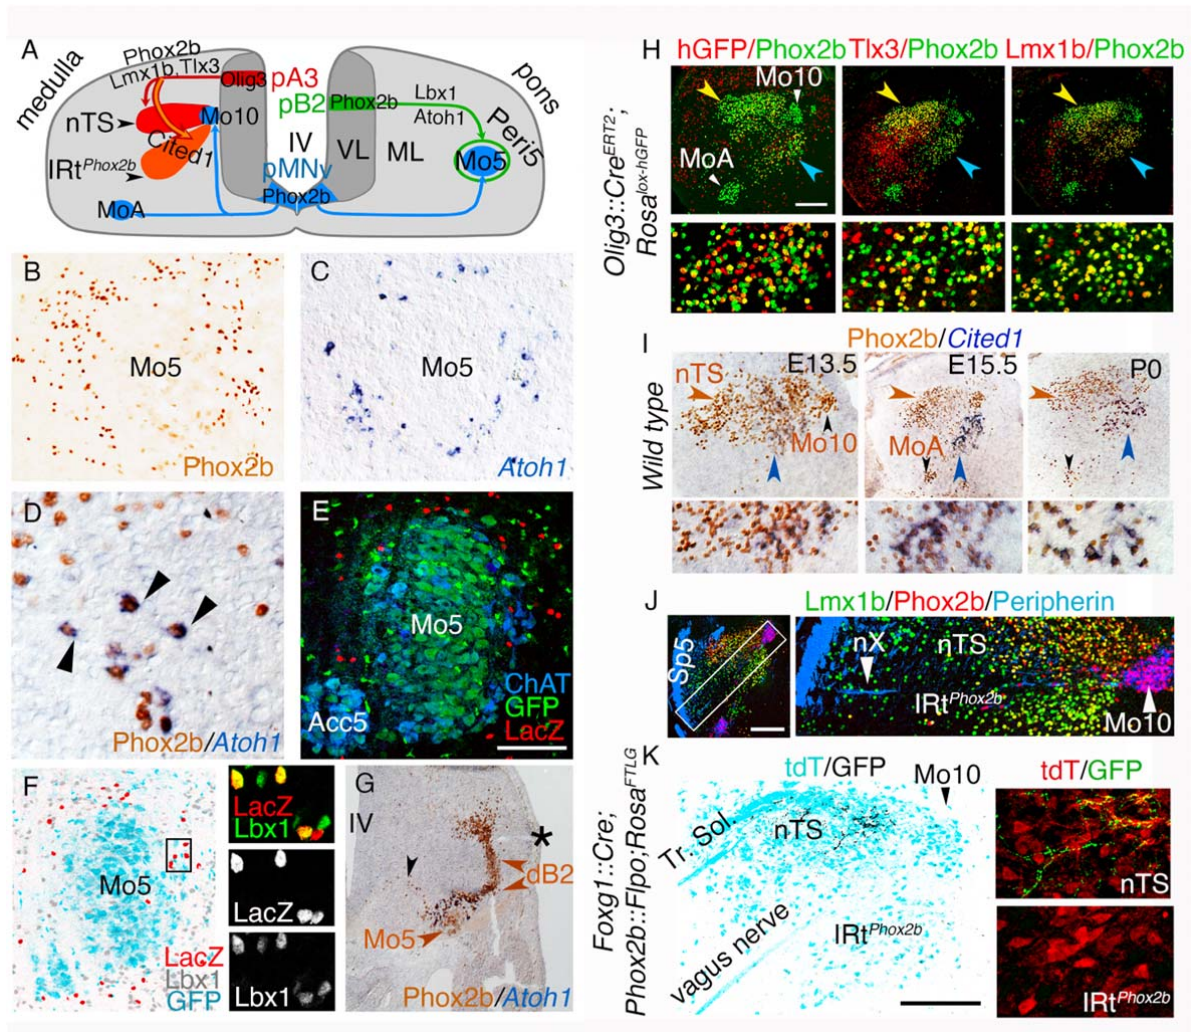

**Fig. 2. Ontogenetic definition of  $IRt^{Phox2b}$  and  $Peri5^{Atoh1}$ .** (A) Two schematic hemi-sections of the embryonic medulla (left) or pons (right), showing the origin of branchiomotor nuclei (Mo5, MoA and Mo10),  $Peri5^{Phox2b}$  and  $IRt^{Phox2b}$  in progenitor (p) domains of the ventricular layer (VL), their settling sites in the mantle layer (ML), and their transcriptional codes. (B,C,D) Coronal sections through the pons at E18.5, showing  $Peri5^{Phox2b}$  (B) or  $Peri5^{Atoh1}$  (C,D) labeled with the indicated antibody or probe.  $Peri5^{Atoh1}$  cells co-express  $Phox2b$  and  $Atoh1$  (arrowheads in D). (E) Coronal sections through the pons of a  $Phox2b::Flpo; Atoh1::Cre; Fela$  mouse at P0, showing the double-recombined ( $nlsLacZ^+$ ) cells of  $Peri5^{Atoh1}$  (red). (F) Coronal section through Mo5 in a  $Phox2b::Flpo; Atoh1::Cre; Fela$  mouse, where  $Phox2b^+$  motoneurons are  $GFP^+$  (cyan) and  $Phox2b^+/Atoh1^+$  neurons are  $nlsLacZ^+$  (red), counterstained for  $Lbx1$  (grey at low magnification, green in the close ups). (G) Coronal section through the pons at E11.5 showing the migrating  $Phox2b^+$  Mo5 and dB2 precursors (black and brown arrowheads respectively) and, at their

874 meeting point, Peri5<sup>Atoh1</sup> cells that have switched on *Atoh1*. Asterisk: lateral recess of the IVth  
875 ventricle (IV). **(H)** Coronal sections through nTS (yellow arrowhead) and IRt<sup>Phox2b</sup> (blue  
876 arrowhead) at E18.5, at low (upper) or high (lower) magnification, stained with the indicated  
877 antibodies. A history of *Olig3* expression is revealed by recombination of the histone-GFP  
878 (hGFP) reporter in the *Olig3::Cre<sup>ERT2</sup>* background (left). Mosaicism is likely due to incomplete  
879 induction of Cre. Virtually all cells of IRt<sup>Phox2b</sup> (98% ± 0.2 SEM, n=3 animals) co-expressed  
880 *Lmx1b* with *Phox2b*. **(I)** Coronal sections through nTS (brown arrowhead) and IRt<sup>Phox2b</sup> (blue  
881 arrowhead) at indicated stages at low (upper) and high (lower) magnification, immunostained for  
882 *Phox2b* and in situ hybridized for *Cited1*. **(J)** Coronal section at E15.5 showing that nTS and  
883 IRt<sup>Phox2b</sup> are separated by the medullary root of the vagus nerve (nX). Sp5, spinal trigeminal tract.  
884 **(K)** Coronal section through the nTS and IRt<sup>Phox2b</sup> of an adult, showing the central boutons of  
885 epibranchial ganglia (that express *Foxg1* (68) and are labeled by *SypGFP* in a  
886 *Foxg1<sup>iresCre</sup>;Phox2bFlpo;Rosa<sup>FTLG</sup>* background) in the nTS, but not IRt<sup>Phox2b</sup> (left). Magnified details  
887 (right). Scale bars, **(E)** 100 μm; **(H, J, K)** 200 μm.

888  
889

890  
891  
892  
893  
894  
895  
896  
897  
898  
899  
900  
901  
902  
903  
904  
905  
906  
907  
908  
909  
910  
911  
912  
913  
914  
915  
916  
917  
918  
919  
920  
921  
922  
923  
924  
925  
926  
927  
928  
929  
930  
931  
932

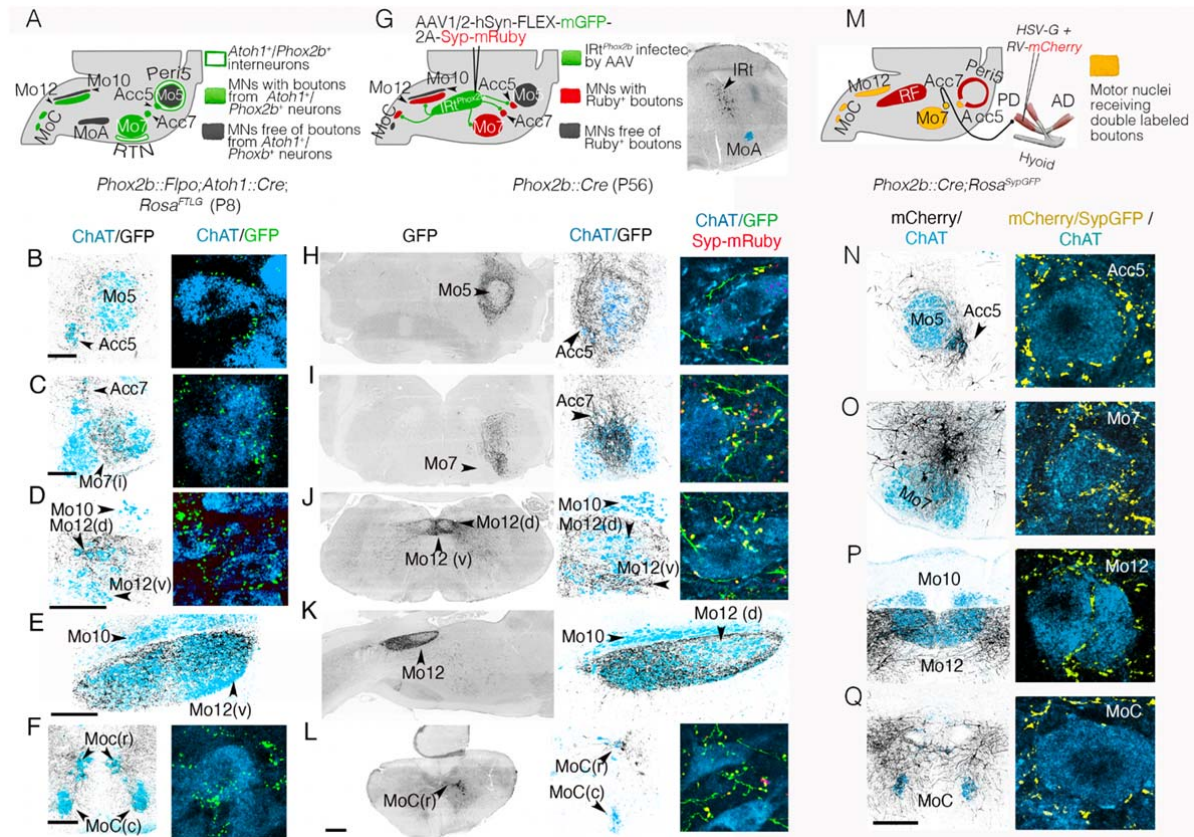

**Fig. 3. Projections of IRT<sup>Phox2b</sup> and Peri5<sup>Atoh1</sup> on hindbrain motoneurons.** (A) Strategy for the transgenic labeling of projections from Peri5<sup>Atoh1</sup> (and RTN) and summary of the results; (B-F) Coronal (B-D,F) or parasagittal (E) sections through a P8 hindbrain showing GFP-labeled boutons (black) on motoneurons (blue) at medium (left) and high (right) magnification. (G) Strategy for the viral tracing of projections from IRT<sup>Phox2b</sup> and summary of the results (left), and mGFP-labeled infected cells of IRT<sup>Phox2b</sup> (right); (H-L) Coronal (H-J,L) or parasagittal (K) sections through a P56 hindbrain showing the GFP-labeled fibers (black) of IRT<sup>Phox2b</sup> neurons at low (left) and medium (middle) magnifications, and in extreme close-ups (right), together with Syp-mRuby labeled boutons on motoneurons (blue). Scale bar, (B-F) 200  $\mu$ m, (H-L) 500  $\mu$ m. (M) schematic for retrograde tracing of premotor neurons for the right posterior digastric muscle, in a *Phox2b::Cre;Rosa<sup>SypGFP</sup>*, and summary of the results. (N-Q) (left) Coronal sections through the hindbrain at P8 showing the *mCherry*<sup>+</sup> projections (black) of premotor neurons on the motor nuclei (*ChAT*<sup>+</sup>, blue); (right) close ups on motoneurons receiving double-labeled *Syp-GFP/mCherry* boutons (yellow). Scale bars, (B-F) 200  $\mu$ m for the left column, (H-L) 500  $\mu$ m for the left column, (N-Q) 200  $\mu$ m for the left column.



933  
934  
935  
936  
937  
938  
939  
940  
941  
942  
943  
944  
945  
946  
947  
948  
949  
950  
951  
952  
953  
954  
955  
956  
957  
958  
959  
960  
961  
962  
963  
964  
965  
966  
967  
968  
969  
970  
971  
972  
973  
974  
975  
976  
977  
978  
979  
980  
981  
982  
983  
984  
985  
986

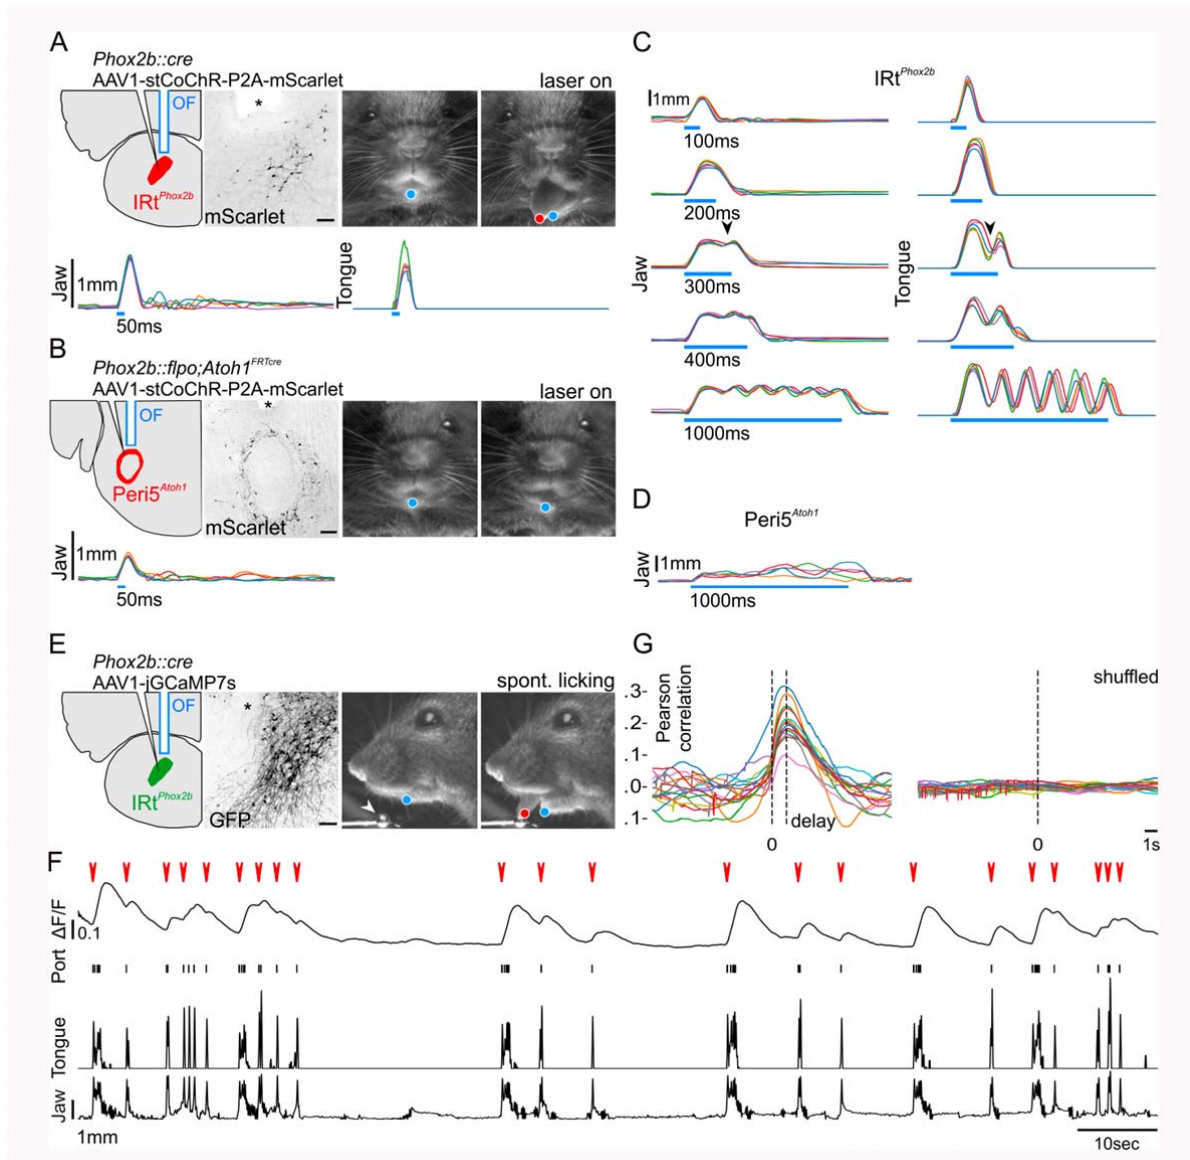

**Fig. 4. Orofacial movements triggered by  $IRT^{Phox2b}$  and  $Peri5^{Atoh1}$  and activity of  $IRT^{Phox2b}$  during voluntary licking.** (A) (Upper left) Schematic of the viral injection and fiber optic implantation for stimulation of  $IRT^{Phox2b}$  and transverse section through the hindbrain showing transduced  $IRT^{Phox2b}$  neurons and position of optical fiber (OF, asterisk); scale bar 100  $\mu$ m. (Upper right) Example frames of the mouse face before and during stimulation including DeepLabCut tracked position of jaw (blue) and tongue (red). (Lower) Individual traces of tracked jaw and tongue position on the Y-axis upon 50 ms stimulation (5 trials). (B) (Upper left) Schematic of the viral injection and fiber optic implantation for stimulation of  $Peri5^{Atoh1}$  and transverse section through the hindbrain showing transduced  $Peri5^{Atoh1}$  neurons and position of optical fiber

987 (asterisk); scale bar 200  $\mu\text{m}$ . (Upper right) Example frames of the mouse face before and during  
988 stimulation including DeepLabCut tracked position of jaw (blue). (Lower) Individual traces (5  
989 trials) of tracked jaw position on the Y-axis upon 50 ms stimulation. (C) Individual traces (5  
990 trials) of tracked jaw (left) and tongue (right) position on the Y-axis upon stimulation of  $\text{IRt}^{\text{Phox2b}}$   
991 of increasing length. A repetitive movement is triggered by stimulation beyond 300 ms  
992 (arrowhead). (D) Individual traces (5 trials) of tracked jaw position on the Y-axis upon a 1000 ms  
993 stimulation of  $\text{Peri5}^{\text{Atab1}}$ . The jaw remains open and quivers non-rhythmically during the stimulus.  
994 (E) (left) Schematic of viral injection and optical fiber implantation for observation of  $\text{IRt}^{\text{Phox2b}}$   
995 activity, and transverse section through the hindbrain showing transduced  $\text{IRt}^{\text{Phox2b}}$  neurons and  
996 position of optical fiber (asterisk); scale bar 100  $\mu\text{m}$ . (Middle) Example frames of the mouse face  
997 before and during a bout of licking from a lick port (arrowhead), during a photometry recording,  
998 including DeepLabCut tracked position of jaw (blue) and tongue (red). (F) Example trace of  
999 change in bulk fluorescence of  $\text{IRt}^{\text{Phox2b}}$  during a recording session (~2 mins) of unitary licking  
1000 events and licking bouts (red arrowheads), contact events with the lick port and movements of  
1001 the tongue and the jaw on the Y axis. (G) (left) Superimposed correlation curves between licking  
1002 activity and calcium activity (each curve corresponding to one of 15 recording sessions, each 1-5  
1003 min, in 1 mouse) which peaked at 1.2s after lick port contact; (right) no peak was observed after  
1004 shuffling the data.

1005  
1006  
1007

1008  
1009  
1010  
1011  
1012  
1013  
1014  
1015  
1016  
1017  
1018  
1019  
1020  
1021  
1022  
1023  
1024  
1025  
1026  
1027  
1028  
1029  
1030  
1031  
1032  
1033  
1034  
1035  
1036  
1037  
1038

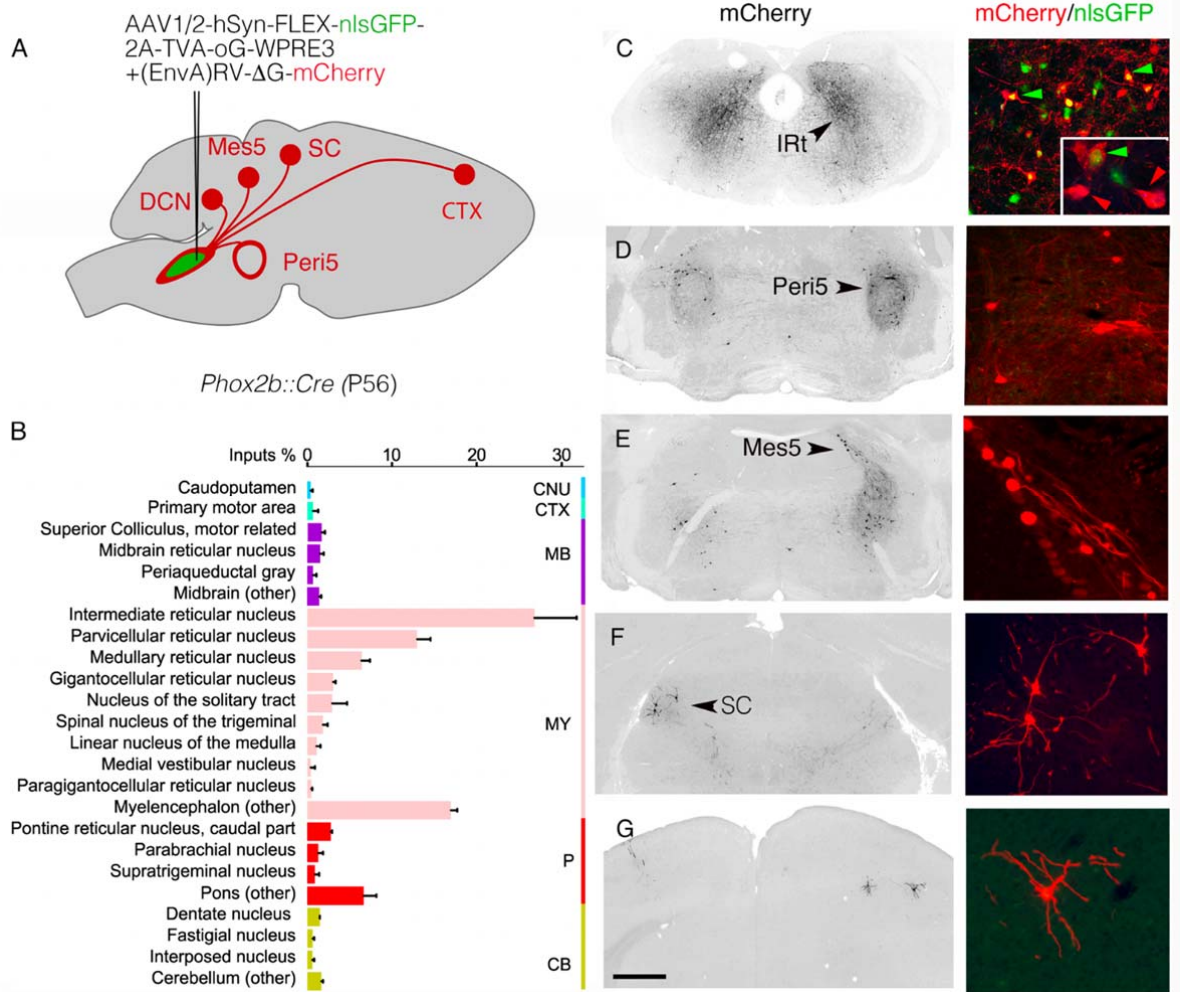

1039  
1040  
1041  
1042  
1043  
1044  
1045  
1046  
1047  
1048  
1049  
1050  
1051

**Fig. 5. Inputs to IRT<sup>Phox2b</sup>**

(A) Strategy for the retrograde trans-synaptic labeling of input neurons to IRT<sup>Phox2b</sup> with exemplar sites of input. (B) Bar graph of the relative percentage of monosynaptic input neurons (1354±596 SEM) labelled from IRT<sup>Phox2b</sup> starter neurons (199±91 SEM) from 3 animals (seeding efficiency 7.4±1.8 inputs/starter neuron), per brain region as defined in the Allen Brain Atlas. Rabies-labelled input neurons were largely (74.5±1.1%) restricted to the medulla (pink, MY) and exhibited a slight but consistent ipsilateral bias (55.6±3.0%). Major sources of these medullary inputs were the Intermediate, Gigantocellular and Parvocellular Reticular Nuclei. Inputs from the cortex, midbrain and pons represented a minority of rabies-labelled neurons (1.6±0.3%, 6.4±0.5% & 12.3±1.1% respectively). (C,G) Images at low magnification (left) and high magnification (right) of monosynaptic input neurons in the IRT, Peri5, mesencephalic nucleus of the trigeminal nerve, contralateral superior colliculus and motor cortex. Green arrowheads: seed

1052 neurons; red arrowheads: (n-1) IRt neurons. CB, cerebellum; CNU, caudoputamen; CTX, cortex;  
1053 DCN, deep cerebellar nucleus; MB, midbrain; Mes5, mesencephalic nucleus of the trigeminal  
1054 nerve; MY, myelencephalon; P, pons; SC: superior colliculus. Scale bar, 1mm.

1055

1056

1057

1058

1059

1060

1061

1062

1063



## Supplementary figures

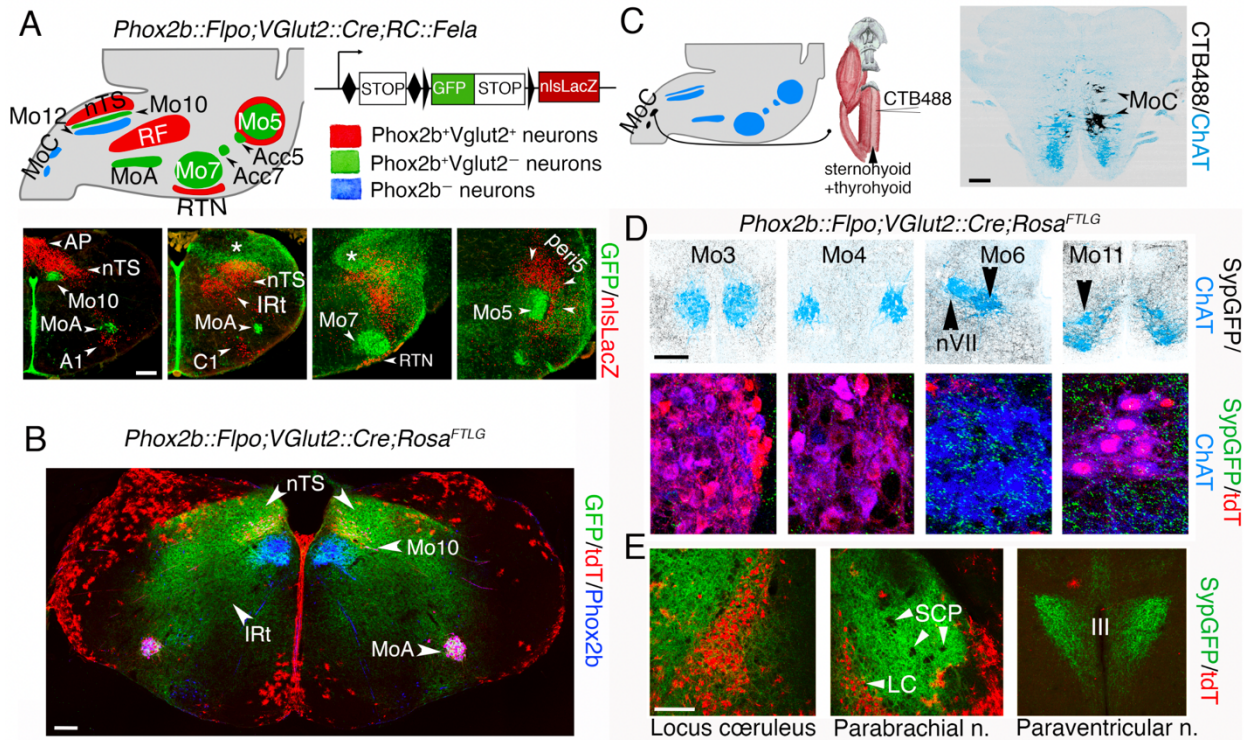

**Fig. S1.** (A) (Upper) Strategy for transgenic labeling of glutamatergic  $Phox2b^+$  interneurons using the *FELA* transgene, and summary of the results. (Lower) Coronal sections through the pons and medulla of a *vGlut2::Cre;Phox2b::Flpo;RC::Fela* embryo at E17.5. Branchiomotor and visceromotor neurons (cholinergic and  $Phox2b^+$ ) express GFP (green), while interneurons that are glutamatergic and  $Phox2b^+$  express *nlsLacZ* (red). The dorsal aspect of the hindbrain harbors numerous GFP+ astrocytes (asterisks), likely born from  $Phox2b^+$  progenitors, in p3/pMNV (12)(13) or possibly dB2. (B) Coronal section through the medulla of a *vGlut2::Cre;Phox2b::Flpo;Rosa<sup>FTLG</sup>* embryo at E17.5, showing that branchial and visceral neurons have retained tdT expression (since they undergo recombination by *Flpo* alone), while glutamatergic  $Phox2b^+$  neurons in the nTS or IRt have lost tdT, to gain *SypGFP* expression after dual *Cre* and *Flpo* recombination. *Syp-GFP* marks fields of synaptic boutons in discrete areas of the medulla. (C) (left) Strategy for labeling the motor nucleus for the infrahyoid muscles (sternohyoid and thyrohyoid) (MoC), by retrograde transport of CTB. (right) transverse section at the spinal-medulla junction showing two islands of labelled motoneurons (black). (D) Motor nuclei for extraocular muscles (Mo3, Mo4 and Mo6) and for the trapezius and sternocleidomastoid (Mo11), do not receive labelled boutons in a *vGlut2::Cre;Phox2b::Flpo;Rosa<sup>FTLG</sup>*



background at P8. **(E)** Known sites of projection from Phox2b<sup>+</sup> glutamatergic interneurons (including C1 neurons and the nTS) are covered by GFP<sup>+</sup> boutons: the parabrachial nucleus (14), the locus coeruleus and the paraventricular nucleus of the hypothalamus (15). LC, locus coeruleus; SCP, superior cerebellar peduncle; III, third ventricle. Scale bars, 200 μm.

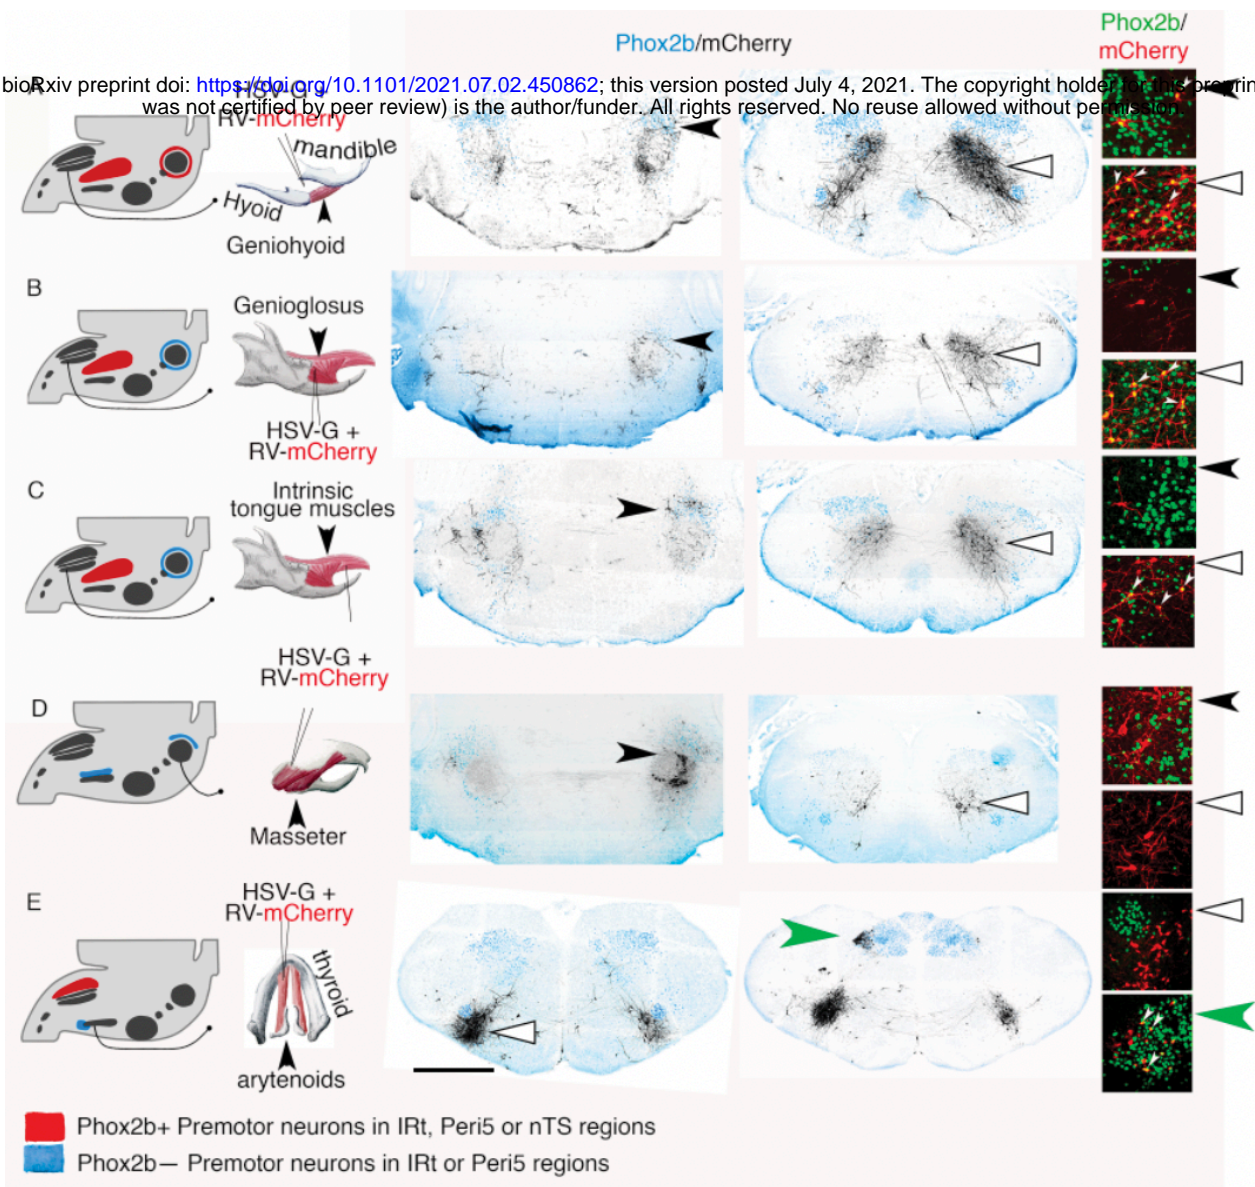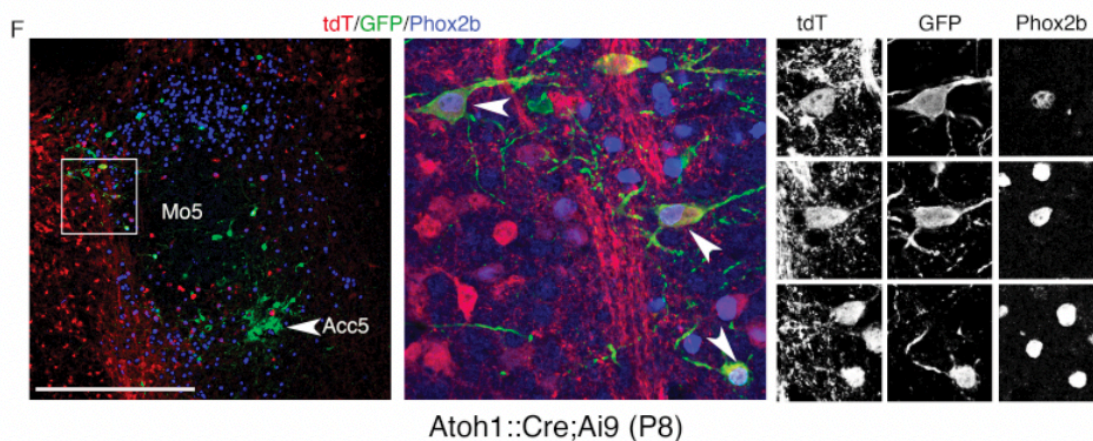

**Fig. S2.** Retrograde monosynaptic labeling of the premotor neurons for the geniohyoid (A), genioglossus (B), intrinsic tongue muscles (C), masseter (D) and thyro-arytenoid (E). (Left column) Labeling strategy and summary of the results. (Middle column) Sections through the pons at the level of Mo5 (A-D, left), or at the level of the IRT (A-D, right, and E, left and right) showing the filled premotor neurons (black) on the landscape of Phox2b+ neurons (blue). (Right column) Close ups of filled premotor neurons (red) either expressing *Phox2b* (green nuclei), or not. The thyro-

arytenoid and masseter have no  $Phox2b^+$  premotor neurons in the IRt or Peri5. **(F)** Coronal section through the peri5 region of a Cre-reporter *Ai9* mouse crossed with *Atob1::Cre*, whose posterior digastric muscle was co-injected with a DG-rabies virus encoding GFP and a helper HSV-G, counter-stained for *Phox2b*, at 3 magnifications from left to right. Three triple-labeled neurons are highlighted, which thus have a history of both *Atob1* and *Phox2b* expression, and are premotor to the posterior digastric. Scale bar, **(A-E)**, 1 mm; **(F)**, 500 $\mu$ m.



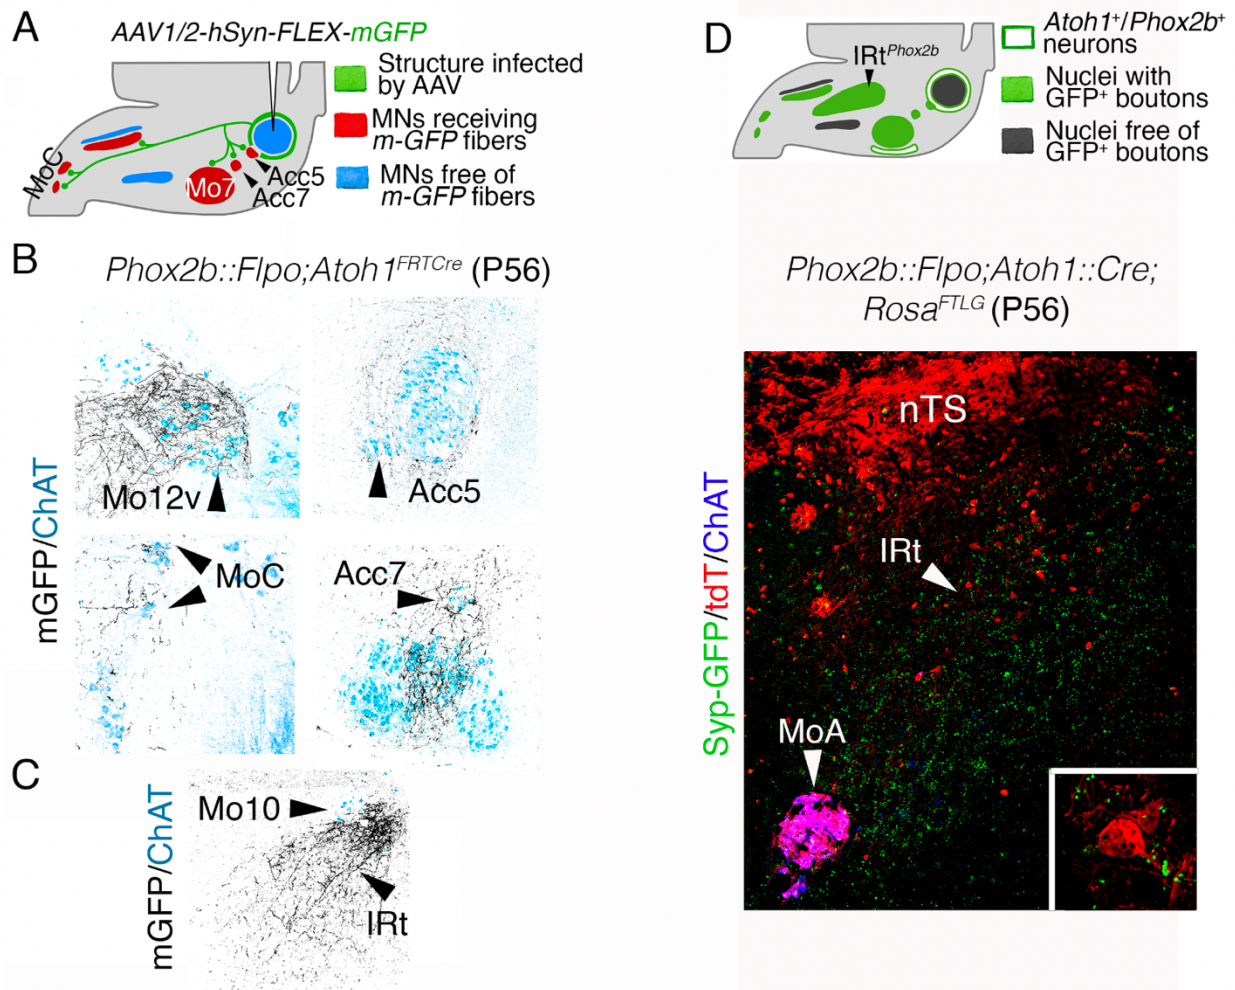

**Fig. S3.** (A): Strategy for viral tracing the projections of Peri5<sup>Atob1</sup> and summary of the results. (B): Coronal sections through the motor nuclei (ChAT<sup>+</sup>, blue) that receive projections from Peri5<sup>Atob1</sup>, labelled with mGFP encoded by the AAV anterograde virus (black). (C): Coronal sections through the medulla showing mGFP-labeled fibers in the IRt. (D): Strategy for transgenic labeling projections from Atoh1<sup>+</sup>/Phox2b<sup>+</sup> cells (Peri5<sup>Atob1</sup> and RTN) using the Rosa<sup>FTLG</sup> transgene and summary of the results already visible in Fig 3A. (D) Projections from Peri5<sup>Atob1</sup> +RTN on IRt<sup>Phox2b</sup> at intermediate and high (inset) magnifications.

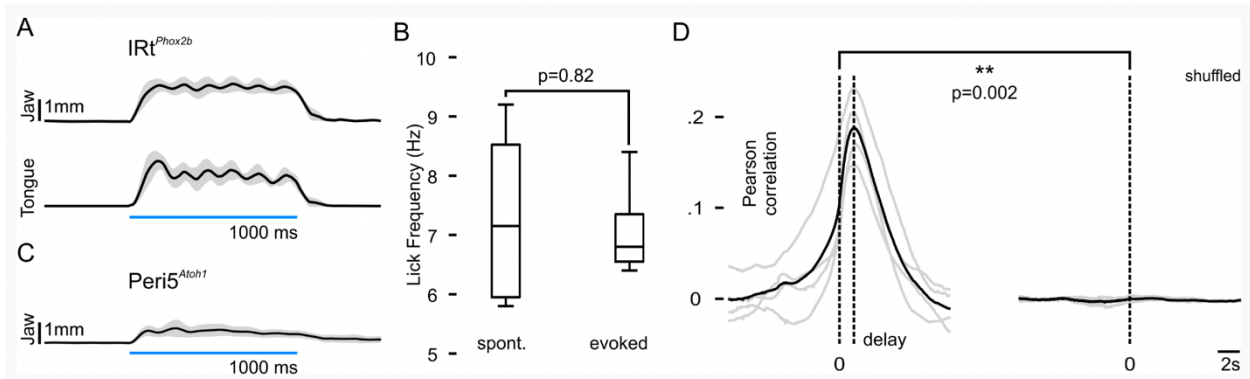

**Fig. S4.** (A) Grand average of tracked position of jaw and tongue on the Y axis upon 1000 ms stimulation of  $IRT^{Phox2b}$  ( $n=4$  mice, 34 trials). (B) Box plot of spontaneous ( $7.3 \text{ Hz} \pm 0.8 \text{ SEM}$ ) ( $n=4$ ) and evoked licking frequency ( $7.1 \text{ Hz} \pm 0.4 \text{ SEM}$ ). (C) Grand average ( $n=4$  mice, 21 trials) of tracked position of the tongue on the Y axis upon 1000 ms stimulation of  $Peri5^{Atob1}$ . (D) (left) Mean shifted correlation curves displayed for each animal ( $n=4$ , gray) and the overall mean (black), displaying a 1.2s delay between lick port contact and maximum correlation; (right) same computation on the same data but with the lick signal shuffled.

**Movie S1.**

Stimulation (1000 ms) of  $IRT^{Phox2b}$ . Displayed at  $1/4$  speed.

**Movie S2.**

Stimulation (1000 ms) of  $Peri5^{Atob1}$ . Displayed at  $1/4$  speed

**Movie S3.**

Activity of  $IRT^{Phox2b}$  during a spontaneous licking bout. Displayed at  $1/4$  speed.
